# Supplementary material for: Explorative Meta-Analysis of 377 Extant Fungal Genomes Predicted a Total Mycobiome Functionality of 42.4 Million KEGG Functions
Source: Front Microbiol. 2020 Feb 6;11:143. doi: 10.3389/fmicb.2020.00143 (PMC7015973; doi:10.3389/fmicb.2020.00143)
Supplement: Supplementary file 1 [file Table_1.xlsx]

## Sheet: Sheet1
Table S1: The 377 completely annotated extant fungal genomes downloaded from the IMG of JGI on August 7th 2019.
#	Domain	Sequencing Status	Study Name	Genome Name / Sample Name	Scaffold	Phylum	Class	Order	Sequencing Center	IMG Genome ID	Gene Count * assembled	GC * assembled	KO groups	KO rate	Intra Red	Species	Species	Trophic Mode
1	Eukaryota	Permanent Draft	1000 Fungal Genomes	Aaosphaeria arxii CBS 175.79	53	Ascomycota	Dothideomycetes	Pleosporales	DOE Joint Genome Institute (JGI)	2761201779	14203	0.5	2795	0.196789	1.32129	Aaosphaeria arxii	Aaosphaeria	Undefined Saprotroph
2	Eukaryota	Permanent Draft	1000 Fungal Genomes	Absidia repens NRRL? 1336 Standard Draft	82	Mucoromycota	Mucoromycetes	Mucorales	DOE Joint Genome Institute (JGI)	2761201600	14919	0.38	2448	0.164086	1.8848	Absidia repens	Absidia	Undefined Saprotroph
3	Eukaryota	Permanent Draft	JBEI- Transcriptomics and Genomics of a Natural Fungal Community in an Extreme Environment	Acidomyces richmondensis BFW	1401	Ascomycota	Dothideomycetes	Capnodiales	DOE Joint Genome Institute (JGI)	2761201621	10352	0.5	2725	0.263234	1.19596	Acidomyces richmondensis	Acidomyces	Endophyte-Plant Pathogen-Unknown Saprotroph-Wood Saprotroph
4	Eukaryota	Permanent Draft	Genome sequencing of thermophilic and alkalophilic fungi	Acremonium alcalophilum ATCC 90507	12	Ascomycota	Sordariomycetes	Glomerellales	DOE Joint Genome Institute (JGI)	2761201885	9521	0.46	2656	0.278962	1.13065	Acremonium alcalophilum	Acremonium	Animal Pathogen-Endophyte-Fungal Parasite-Plant Pathogen-Wood Saprotroph
5	Eukaryota	Permanent Draft	Forest soil microbial communities from France, Sweden and USA, for metatranscriptomics studies	Adustoporia sinuosa LB1	1231	Basidiomycota	Agaricomycetes	Polyporales	DOE Joint Genome Institute (JGI)	2761201881	11327	0.51	2594	0.22901	1.22128	Adustoporia sinuosa	Adustoporia	-
6	Eukaryota	Permanent Draft	Agaricus bisporus: Whole genome sequencing of the leaf-litter degrading homobasi	Agaricus bisporus bisporus H97	28	Basidiomycota	Agaricomycetes	Agaricales	DOE Joint Genome Institute (JGI)	2761201628	10438	0.46	2572	0.246407	1.23756	Agaricus bisporus	Agaricus	Undefined Saprotroph
7	Eukaryota	Permanent Draft	Allomyces macrogynus ATCC 38327	Allomyces macrogynus ATCC 38327	101	Blastocladiomycota	Blastocladiomycetes	Blastocladiales	Broad Institute	2507525033	17386	0.62	2260	0.12999	2.20354	Allomyces macrogynus	Allomyces	Undefined Saprotroph
8	Eukaryota	Permanent Draft	Genome-enabled Investigations of the Role of Secreted Proteins and Reactive Metabolites in Carbon Degradation by Pure and Mixed Ascomycete Fungal Communities	Alternaria alternata SRC1lrK2f	67	Ascomycota	Dothideomycetes	Pleosporales	DOE Joint Genome Institute (JGI)	2761201654	13467	0.51	2792	0.207322	1.27113	Alternaria alternata	Alternaria	Animal Pathogen-Endophyte-Plant Pathogen-Wood Saprotroph
9	Eukaryota	Permanent Draft	Exploring the Genome Diversity of Mycorrhizal Fungi to Understand the Evolution and Functioning of Symbiosis in Woody Shrubs and Trees	Amanita muscaria Koide BX008 Standard Draft	985	Basidiomycota	Agaricomycetes	Agaricales	DOE Joint Genome Institute (JGI)	2761201610	18153	0.48	2622	0.144439	1.25553	Amanita muscaria	Amanita	Ectomycorrhizal
10	Eukaryota	Permanent Draft	Amanita thiersii, a cellulose degrading fungus	Amanita thiersii SKay4041	968	Basidiomycota	Agaricomycetes	Agaricales	DOE Joint Genome Institute (JGI)	2761201848	10354	0.46	2652	0.256133	1.19947	Amanita thiersii	Amanita	Ectomycorrhizal
11	Eukaryota	Permanent Draft	1000 Fungal Genomes	Amniculicola lignicola CBS 123094	276	Ascomycota	Dothideomycetes	Pleosporales	DOE Joint Genome Institute (JGI)	2761201772	15590	0.48	2743	0.175946	1.2541	Amniculicola lignicola	Amniculicola	Undefined Saprotroph
12	Eukaryota	Permanent Draft	Extremophilic Fungi Relevant to Biofuel Production	Amorphotheca resinae ATCC 22711	18	Ascomycota	Leotiomycetes	unclassified	DOE Joint Genome Institute (JGI)	2761201842	9642	0.48	2728	0.282929	1.17412	Amorphotheca resinae	Amorphotheca	Undefined Saprotroph
13	Eukaryota	Permanent Draft	Transcriptomic Characterization of Anaerobic Gut Fungi	Anaeromyces robustus S4	925	Chytridiomycota	Neocallimastigomycetes	Neocallimastigales	DOE Joint Genome Institute (JGI)	2761201632	12832	0.16	1836	0.14308	1.33333	Anaeromyces robustus	Anaeromyces	Animal Endosymbiont
14	Eukaryota	Permanent Draft	1000 Fungal Genomes	Anthostoma avocetta NRRL 3190	454	Ascomycota	Sordariomycetes	Xylariales	DOE Joint Genome Institute (JGI)	2761201880	15755	0.45	2782	0.176579	1.28684	Anthostoma avocetta	Anthostoma	Plant Pathogen
15	Eukaryota	Permanent Draft	1000 Fungal Genomes	Aplosporella prunicola CBS 121167	254	Ascomycota	Dothideomycetes	Botryosphaeriales	DOE Joint Genome Institute (JGI)	2761201861	12579	0.54	2740	0.217823	1.2	Aplosporella prunicola	Aplosporella	Plant Pathogen
16	Eukaryota	Permanent Draft	1000 Fungal Genomes	Artomyces pyxidatus HHB10654	428	Basidiomycota	Agaricomycetes	Russulales	DOE Joint Genome Institute (JGI)	2761201804	15130	0.55	2655	0.175479	1.29868	Artomyces pyxidatus	Artomyces	Undefined Saprotroph
17	Eukaryota	Permanent Draft	Phylogenomics and the origin and diversification of Kingdom Fungi	Ascobolus immersus RN42	636	Ascomycota	Pezizomycetes	Pezizales	DOE Joint Genome Institute (JGI)	2761201883	17877	0.49	2435	0.136209	1.14456	Ascobolus immersus	Ascobolus	Dung Saprotroph
18	Eukaryota	Permanent Draft	Yeasts of Biotechnological, Taxonomic and Physiological Interest	Ascoidea rubescens DSM 1968	57	Ascomycota	Saccharomycetes	Saccharomycetales	DOE Joint Genome Institute (JGI)	2761201744	6802	0.33	2146	0.315495	1.21855	Ascoidea rubescens	Ascoidea	Wood Saprotroph
19	Eukaryota	Finished	Ashbya sp. FD-2008	Ashbya sp. FD-2008	8	Ascomycota	Saccharomycetes	Saccharomycetales	Blumeria Sequencing Consortium, Duke University	2739368093	4690	0.51	2497	0.532409	1.11133	Ashbya sp.	Ashbya	Plant Pathogen
20	Eukaryota	Permanent Draft	Nomination of Aspergillus carbonarius and Aspergillus aculeatus as sequencing targets	Aspergillus aculeatus ATCC 16872	74	Ascomycota	Eurotiomycetes	Eurotiales	DOE Joint Genome Institute (JGI)	2761201759	10845	0.52	2815	0.259567	1.31758	Aspergillus aculeatus	Aspergillus	Plant Pathogen
21	Eukaryota	Permanent Draft	Comparative analysis of Aspergilli to facilitate novel strategies in fungal biotechnology	Aspergillus brasiliensis CBS 101740	96	Ascomycota	Eurotiomycetes	Eurotiales	DOE Joint Genome Institute (JGI)	2761201641	13000	0.5	2780	0.213846	1.35612	Aspergillus brasiliensis	Aspergillus	Animal Pathogen
22	Eukaryota	Permanent Draft	Genome and Transcriptome sequencing of members of the genus Aspergillus	Aspergillus campestris IBT 28561	34	Ascomycota	Eurotiomycetes	Eurotiales	DOE Joint Genome Institute (JGI)	2761201767	9764	0.51	2706	0.277141	1.24464	Aspergillus campestris	Aspergillus	Animal Pathogen-Endophyte-Plant Saprotroph-Soil Saprotroph-Undefined Saprotroph-Wood Saprotroph
23	Eukaryota	Permanent Draft	Nomination of Aspergillus carbonarius and Aspergillus aculeatus as sequencing targets	Aspergillus carbonarius ITEM 5010	383	Ascomycota	Eurotiomycetes	Eurotiales	DOE Joint Genome Institute (JGI)	2761201752	11624	0.52	2668	0.229525	1.42729	Aspergillus carbonarius	Aspergillus	Animal Pathogen-Endophyte-Plant Saprotroph-Soil Saprotroph-Undefined Saprotroph-Wood Saprotroph
24	Eukaryota	Permanent Draft	Aspergillus clavatus NRRL 1	Aspergillus clavatus NRRL 1	143	Ascomycota	Eurotiomycetes	Eurotiales	J. Craig Venter Institute (JCVI)	645666402	9356	0.49	2863	0.306007	1.27489	Aspergillus clavatus	Aspergillus	Animal Pathogen
25	Eukaryota	Permanent Draft	Aspergillus fischeri NRRL 181	Aspergillus fischeri NRRL 181	976	Ascomycota	Eurotiomycetes	Eurotiales	J. Craig Venter Institute (JCVI)	645666414	10697	0.49	2909	0.271945	1.36164	Aspergillus fischeri	Aspergillus	Animal Pathogen-Endophyte-Plant Saprotroph-Soil Saprotroph-Undefined Saprotroph-Wood Saprotroph
26	Eukaryota	Permanent Draft	Aspergillus flavus NRRL 3357	Aspergillus flavus NRRL 3357	2761	Ascomycota	Eurotiomycetes	Eurotiales	J. Craig Venter Institute (JCVI)	645666403	13487	0.48	2881	0.213613	1.45158	Aspergillus flavus	Aspergillus	Animal Pathogen-Plant Pathogen-Wood Saprotroph
27	Eukaryota	Permanent Draft	Aspergillus fumigatus Af293	Aspergillus fumigatus Af293	8	Ascomycota	Eurotiomycetes	Eurotiales	Institut Pasteur, J. Craig Venter Institute (JCVI), Wellcome Trust Sanger Institute	638208601	10152	0.5	2828	0.278566	1.35078	Aspergillus fumigatus	Aspergillus	Animal Pathogen-Undefined Saprotroph
28	Eukaryota	Permanent Draft	Comparative analysis of Aspergilli to facilitate novel strategies in fungal biotechnology	Aspergillus glaucus CBS 516.65	78	Ascomycota	Eurotiomycetes	Eurotiales	DOE Joint Genome Institute (JGI)	2761201693	11277	0.49	2738	0.242795	1.26041	Aspergillus glaucus	Aspergillus	Plant Pathogen
29	Eukaryota	Permanent Draft	Comparative analysis of Aspergilli to facilitate novel strategies in fungal biotechnology	Aspergillus luchuensis CBS 106.47	91	Ascomycota	Eurotiomycetes	Eurotiales	DOE Joint Genome Institute (JGI)	2761201743	13530	0.49	2776	0.205174	1.33862	Aspergillus luchuensis	Aspergillus	Animal Pathogen-Endophyte-Plant Saprotroph-Soil Saprotroph-Undefined Saprotroph-Wood Saprotroph
30	Eukaryota	Finished	Aspergillus nidulans FGSC A4	Aspergillus nidulans FGSC A4	8	Ascomycota	Eurotiomycetes	Eurotiales	ANRT	2739368082	10533	0.5	2796	0.265451	1.27217	Aspergillus nidulans	Aspergillus	Undefined Saprotroph
31	Eukaryota	Permanent Draft	Aspergillus niger	Aspergillus niger ATCC 1015	24	Ascomycota	Eurotiomycetes	Eurotiales	DOE Joint Genome Institute (JGI)	2761201634	11910	0.5	2738	0.229891	1.34551	Aspergillus niger	Aspergillus	Plant Pathogen-Wood Saprotroph
32	Eukaryota	Permanent Draft	Genome and Transcriptome sequencing of members of the genus Aspergillus	Aspergillus novofumigatus IBT 16806	50	Ascomycota	Eurotiomycetes	Eurotiales	DOE Joint Genome Institute (JGI)	2761201763	11549	0.49	2820	0.244177	1.33511	Aspergillus novofumigatus	Aspergillus	Animal Pathogen-Endophyte-Plant Saprotroph-Soil Saprotroph-Undefined Saprotroph-Wood Saprotroph
33	Eukaryota	Permanent Draft	Genome and Transcriptome sequencing of members of the genus Aspergillus	Aspergillus ochraceoroseus IBT 24754	29	Ascomycota	Eurotiomycetes	Eurotiales	DOE Joint Genome Institute (JGI)	2761201795	8924	0.44	2681	0.300426	1.18426	Aspergillus ochraceoroseus	Aspergillus	Animal Pathogen-Endophyte-Plant Saprotroph-Soil Saprotroph-Undefined Saprotroph-Wood Saprotroph
34	Eukaryota	Permanent Draft	Understanding the mechanisms of enzyme hyperporduction in Aspergillus	Aspergillus phoenicis bv. (Corda) Thom ATCC 13157	44	Ascomycota	Eurotiomycetes	Eurotiales	DOE Joint Genome Institute (JGI)	2761201788	11977	0.5	2756	0.230108	1.34688	Aspergillus phoenicis	Aspergillus	Animal Pathogen-Endophyte-Plant Saprotroph-Soil Saprotroph-Undefined Saprotroph-Wood Saprotroph
35	Eukaryota	Permanent Draft	Fungal Genome Program Extremophiles	Aspergillus ruber CBS 135680	102	Ascomycota	Eurotiomycetes	Eurotiales	DOE Joint Genome Institute (JGI)	2761201659	10076	0.49	2722	0.270147	1.24247	Aspergillus ruber	Aspergillus	Animal Pathogen
36	Eukaryota	Permanent Draft	Genome and Transcriptome sequencing of members of the genus Aspergillus	Aspergillus steynii IBT 23096	34	Ascomycota	Eurotiomycetes	Eurotiales	DOE Joint Genome Institute (JGI)	2761201819	13211	0.49	2784	0.210733	1.37069	Aspergillus steynii	Aspergillus	Animal Pathogen-Endophyte-Plant Saprotroph-Soil Saprotroph-Undefined Saprotroph-Wood Saprotroph
37	Eukaryota	Permanent Draft	Comparative analysis of Aspergilli to facilitate novel strategies in fungal biotechnology	Aspergillus sydowii CBS 593.65	46	Ascomycota	Eurotiomycetes	Eurotiales	DOE Joint Genome Institute (JGI)	2761201734	13620	0.5	2836	0.208223	1.39951	Aspergillus sydowii	Aspergillus	Animal Pathogen
38	Eukaryota	Permanent Draft	Aspergillus terreus NIH2624	Aspergillus terreus NIH2624	19	Ascomycota	Eurotiomycetes	Eurotiales	Broad Institute, J. Craig Venter Institute (JCVI), University of Manchester	640281008	10556	0.53	2689	0.254737	1.33879	Aspergillus terreus	Aspergillus	Animal Pathogen-Wood Saprotroph
39	Eukaryota	Permanent Draft	Comparative analysis of Aspergilli to facilitate novel strategies in fungal biotechnology	Aspergillus tubingensis CBS 134.48	17	Ascomycota	Eurotiomycetes	Eurotiales	DOE Joint Genome Institute (JGI)	2761201676	12322	0.49	2753	0.223422	1.34435	Aspergillus tubingensis	Aspergillus	Endophyte-Animal Pathogen-Plant Saprotroph-Soil Saprotroph
40	Eukaryota	Permanent Draft	Comparative analysis of Aspergilli to facilitate novel strategies in fungal biotechnology	Aspergillus versicolor CBS 583.65	18	Ascomycota	Eurotiomycetes	Eurotiales	DOE Joint Genome Institute (JGI)	2761201685	13228	0.5	2830	0.21394	1.4106	Aspergillus versicolor	Aspergillus	Animal Pathogen
41	Eukaryota	Permanent Draft	Comparative analysis of Aspergilli to facilitate novel strategies in fungal biotechnology	Aspergillus wentii DTO 134E9	21	Ascomycota	Eurotiomycetes	Eurotiales	DOE Joint Genome Institute (JGI)	2761201718	12442	0.48	2789	0.22416	1.35066	Aspergillus wentii	Aspergillus	Animal Pathogen
42	Eukaryota	Permanent Draft	Forest soil microbial communities from France, Sweden and USA, for metatranscriptomics studies	Atractiella rhizophila PMI 95 Standard Draft	1484	Basidiomycota	Atractiellomycetes	Atractiellales	DOE Joint Genome Institute (JGI)	2761201847	17606	0.49	2267	0.128763	1.47375	Atractiella rhizophila	Atractiella	Undefined Saprotroph
43	Eukaryota	Permanent Draft	1000 Fungal Genomes	Aulographum hederae CBS 113979	151	Ascomycota	Dothideomycetes	unclassified	DOE Joint Genome Institute (JGI)	2761201841	12127	0.52	2683	0.221242	1.17741	Aulographum hederae	Aulographum	Undefined Saprotroph
44	Eukaryota	Permanent Draft	The varieties of the black yeast-like fungus Aureobasidium pullulans: evolution and use in biotechnology	Aureobasidium pullulans melanogenum CBS 110374	118	Ascomycota	Dothideomycetes	Dothideales	DOE Joint Genome Institute (JGI)	2761201607	10594	0.5	2741	0.258731	1.22583	Aureobasidium pullulans	Aureobasidium	Animal Pathogen-Endophyte-Epiphyte-Plant Pathogen
45	Eukaryota	Permanent Draft	SAP - Community proposal to sequence a diverse assemblage of saprotrophic Basidiomycota (Agaricomycotina)	Auricularia subglabra TFB-10046 SS	676	Basidiomycota	Agaricomycetes	Auriculariales	DOE Joint Genome Institute (JGI)	2761201613	25459	0.59	2759	0.10837	1.44255	Auricularia subglabra	Auricularia	Undefined Saprotroph
46	Eukaryota	Permanent Draft	1000 Fungal Genomes	Auriscalpium vulgare FP105234-Sp	1255	Basidiomycota	Agaricomycetes	Russulales	DOE Joint Genome Institute (JGI)	2761201765	16931	0.57	2634	0.155573	1.29233	Auriscalpium vulgare	Auriscalpium	Plant Pathogen-Wood Saprotroph
47	Eukaryota	Permanent Draft	Yeasts of Biotechnological, Taxonomic and Physiological Interest	Babjeviella inositovora NRRL Y-12698	44	Ascomycota	Saccharomycetes	Saccharomycetales	DOE Joint Genome Institute (JGI)	2761201606	6403	0.48	2420	0.377948	1.19339	Babjeviella inositovora	Babjeviella	Undefined Saprotroph
48	Eukaryota	Permanent Draft	1000 Fungal Genomes	Backusella circina FSU 941	1002	Mucoromycota	Mucoromycetes	Mucorales	DOE Joint Genome Institute (JGI)	2761201831	17039	0.34	2461	0.144433	1.95124	Backusella circina	Backusella	Undefined Saprotroph
49	Eukaryota	Permanent Draft	1000 Fungal Genomes	Basidiobolus meristosporus CBS 931.73	1032	Zoopagomycota	Basidiobolomycetes	Basidiobolales	DOE Joint Genome Institute (JGI)	2761201680	16111	0.43	2655	0.164794	2.08851	Basidiobolus meristosporus	Basidiobolus	Animal Endosymbiont-Animal Pathogen-Undefined Saprotroph
50	Eukaryota	Permanent Draft	Batrachochytrium dendrobatidis	Batrachochytrium dendrobatidis JAM81	127	Chytridiomycota	Chytridiomycetes	Rhizophydiales	DOE Joint Genome Institute (JGI)	2761201902	8732	0.39	2133	0.244274	1.14815	Batrachochytrium dendrobatidis	Batrachochytrium	Animal Pathogen
51	Eukaryota	Permanent Draft	Sequencing of pathogens and extremophiles in the Dothideomycetes	Baudoinia compniacensis UAMH 10762	19	Ascomycota	Dothideomycetes	Capnodiales	DOE Joint Genome Institute (JGI)	2761201653	10513	0.55	2705	0.2573	1.17523	Baudoinia compniacensis	Baudoinia	Undefined Saprotroph
52	Eukaryota	Permanent Draft	Beauveria bassiana CH	Beauveria bassiana CH	241	Ascomycota	Sordariomycetes	Hypocreales	Beijing Genomics Institute (BGI)	2506783003	40500	0.52	2681	0.0661975	2.11749	Beauveria bassiana	Beauveria	Animal Pathogen
53	Eukaryota	Permanent Draft	Cochliobolus heterostrophus resequencing - 4 strains	Bipolaris maydis ATCC 48331	149	Ascomycota	Dothideomycetes	Pleosporales	DOE Joint Genome Institute (JGI)	2761201715	12720	0.51	2797	0.21989	1.24741	Bipolaris maydis	Bipolaris	Plant Pathogen
54	Eukaryota	Permanent Draft	Cochliobolus: expanded and deepened	Bipolaris oryzae ATCC 44560	484	Ascomycota	Dothideomycetes	Pleosporales	DOE Joint Genome Institute (JGI)	2761201673	12007	0.51	2772	0.230865	1.24351	Bipolaris oryzae	Bipolaris	Plant Pathogen
55	Eukaryota	Permanent Draft	Cochliobolus sativus	Bipolaris sorokiniana ND90Pr	122	Ascomycota	Dothideomycetes	Pleosporales	DOE Joint Genome Institute (JGI)	2761201622	12250	0.5	2781	0.22702	1.24308	Bipolaris sorokiniana	Bipolaris	Plant Pathogen
56	Eukaryota	Permanent Draft	SAP - Community proposal to sequence a diverse assemblage of saprotrophic Basidiomycota (Agaricomycotina)	Bjerkandera adusta HHB-12826-SP SB-22	435	Basidiomycota	Agaricomycetes	Polyporales	DOE Joint Genome Institute (JGI)	2761201615	15473	0.55	2694	0.17411	1.25427	Bjerkandera adusta	Bjerkandera	Wood Saprotroph
57	Eukaryota	Permanent Draft	Blastomyces gilchristii SLH14081	Blastomyces gilchristii SLH14081	69	Ascomycota	Eurotiomycetes	Onygenales	Broad Institute	648943101	10047	0.36	2711	0.269832	1.17411	Blastomyces gilchristii	Blastomyces	Animal Pathogen-Undefined Saprotroph
58	Eukaryota	Permanent Draft	SAP - Community proposal to sequence a diverse assemblage of saprotrophic Basidiomycota (Agaricomycotina)	Boletus edulis BED1	916	Basidiomycota	Agaricomycetes	Boletales	DOE Joint Genome Institute (JGI)	2761201836	16933	0.5	2603	0.153723	1.22858	Boletus edulis	Boletus	Ectomycorrhizal
59	Eukaryota	Permanent Draft	SAP - Community proposal to sequence a diverse assemblage of saprotrophic Basidiomycota (Agaricomycotina)	Botryobasidium botryosum FD-172 SS1	305	Basidiomycota	Agaricomycetes	Cantharellales	DOE Joint Genome Institute (JGI)	2761201614	16526	0.52	2632	0.159264	1.27508	Botryobasidium botryosum	Botryobasidium	Undefined Saprotroph
60	Eukaryota	Permanent Draft	Botryotinia fuckeliana B05.10	Botrytis cinerea B05.10	589	Ascomycota	Leotiomycetes	Helotiales	Broad Institute	645666404	16584	0.43	2740	0.165219	1.3292	Botrytis cinerea	Botrytis	Plant Pathogen
61	Eukaryota	Permanent Draft	Dekkera (Brettanomyces) bruxellensis	Brettanomyces bruxellensis CBS 2499	63	Ascomycota	Saccharomycetes	Saccharomycetales	DOE Joint Genome Institute (JGI)	2761201710	5636	0.4	2140	0.379702	1.16121	Brettanomyces bruxellensis	Brettanomyces	-
62	Eukaryota	Permanent Draft	1000 Fungal Genomes	Byssothecium circinans CBS 675.92	125	Ascomycota	Dothideomycetes	Pleosporales	DOE Joint Genome Institute (JGI)	2761201777	15785	0.49	2752	0.174343	1.28706	Byssothecium circinans	Byssothecium	Undefined Saprotroph
63	Eukaryota	Permanent Draft	Fungal endosymbiont bacterial communities from various locations	C. Glomeribacter gigasporarum Genome Extracted from a Metagenome	90	Mucoromycota	Glomeromycetes	Diversisporales	DOE Joint Genome Institute (JGI)	2681812918	2256	0.55	877	0.388741	1.18358	C. Glomeribacter	C.	-
64	Eukaryota	Permanent Draft	1000 Fungal Genomes	Cadophora sp. DSE1049	862	Ascomycota	Leotiomycetes	Helotiales	DOE Joint Genome Institute (JGI)	2761201811	22766	0.46	2843	0.124879	1.51495	Cadophora sp.	Cadophora	Endophyte
65	Eukaryota	Permanent Draft	Community proposal to sequence a diverse assemblage of saprotrophic Basidiomycota (Agaricomycotina)	Calocera cornea HHB12733	505	Basidiomycota	Dacrymycetes	Dacrymycetales	DOE Joint Genome Institute (JGI)	2761201705	13177	0.57	2489	0.18889	1.22378	Calocera cornea	Calocera	Wood Saprotroph
66	Eukaryota	Permanent Draft	Community proposal to sequence a diverse assemblage of saprotrophic Basidiomycota (Agaricomycotina)	Calocera viscosa TUFC12733	206	Basidiomycota	Dacrymycetes	Dacrymycetales	DOE Joint Genome Institute (JGI)	2761201741	12378	0.56	2533	0.204637	1.24161	Calocera viscosa	Calocera	Wood Saprotroph
67	Eukaryota	Finished	Candida albicans SC5314	Candida albicans SC5314	8	Ascomycota	Saccharomycetes	Saccharomycetales	Stanford University	2738541350	6245	0.33	2675	0.428343	1.17047	Candida albicans	Candida	Animal pathogen
68	Eukaryota	Finished	Candida dubliniensis CD36	Candida dubliniensis CD36	8	Ascomycota	Saccharomycetes	Saccharomycetales	Wellcome Trust Sanger Institute	645666405	5972	0.33	2672	0.447421	1.16954	Candida dubliniensis	Candida	Animal pathogen
69	Eukaryota	Permanent Draft	Candida tropicalis MYA-3404	Candida tropicalis MYA-3404	24	Ascomycota	Saccharomycetes	Saccharomycetales	Broad Institute	645666406	6441	0.33	2594	0.402732	1.2313	Candida tropicalis	Candida	Animal Pathogen-Endophyte-Undefined Saprotroph
70	Eukaryota	Permanent Draft	1000 Fungal Genomes	Catenaria anguillulae PL171 Improved Draft	271	Blastocladiomycota	Blastocladiomycetes	Blastocladiales	DOE Joint Genome Institute (JGI)	2761201623	12804	0.56	1881	0.146907	1.23073	Catenaria anguillulae	Catenaria	Undefined Saprotroph
71	Eukaryota	Permanent Draft	Exploring the Genome Diversity of Mycorrhizal Fungi to Understand the Evolution and Functioning of Symbiosis in Woody Shrubs and Trees	Cenococcum geophilum 1.58	161	Ascomycota	Dothideomycetes	unclassified	DOE Joint Genome Institute (JGI)	2761201638	14748	0.38	2683	0.181923	1.18673	Cenococcum geophilum	Cenococcum	Ectomycorrhizal
72	Eukaryota	Permanent Draft	Ceratocystis fimbriata C1421 genome sequencing	Ceratocystis fimbriata C1421 v. 3	399	Ascomycota	Sordariomycetes	Microascales	FASTERIS, Inqaba Biotechnologies	2767802002	7266	0.48	2507	0.345032	1.10211	Ceratocystis fimbriata	Ceratocystis	Plant pathogen
73	Eukaryota	Permanent Draft	Cercospora sojina	Cercospora sojina	1804	Ascomycota	Dothideomycetes	Capnodiales		2506520004	39435	0.54	2716	0.0688728	1.81186	Cercospora sojina	Cercospora	Plant pathogen
74	Eukaryota	Permanent Draft	Dothideomycete sequencing and comparative analysis	Cercospora zeae-maydis SCOH1-5	121	Ascomycota	Dothideomycetes	Capnodiales	DOE Joint Genome Institute (JGI)	2761201826	12020	0.5	2768	0.230283	1.22724	Cercospora zeae-maydis	Cercospora	Plant pathogen
75	Eukaryota	Permanent Draft	Basidiomycetes Isolates that Secrete High Levels of Oxidase and Hydrolase Enzymes	Cerrena unicolor 303	468	Basidiomycota	Agaricomycetes	Polyporales	DOE Joint Genome Institute (JGI)	2761201866	12966	0.48	2720	0.209779	1.24559	Cerrena unicolor	Cerrena	Plant pathogen
76	Eukaryota	Permanent Draft	Chaetomium globosum CBS 148.51	Chaetomium globosum CBS 148.51	37	Ascomycota	Sordariomycetes	Sordariales	Broad Institute	645666407	11232	0.56	2551	0.227119	1.21795	Chaetomium globosum	Chaetomium	Dung Saprotroph-Endophyte-Wood Saprotroph
77	Eukaryota	Permanent Draft	Forest soil microbial communities from France, Sweden and USA, for metatranscriptomics studies	Chalara longipes BDJ	44	Ascomycota	Leotiomycetes	Helotiales	DOE Joint Genome Institute (JGI)	2761201886	19765	0.48	2837	0.143537	1.42228	Chalara longipes	Chalara	Endophyte-Plant Pathogen-Wood Saprotroph
78	Eukaryota	Permanent Draft	Exploring the Genome Diversity of Mycorrhizal Fungi to Understand the Evolution and Functioning of Symbiosis in Woody Shrubs and Trees	Choiromyces venosus 120613-1	572	Ascomycota	Pezizomycetes	Pezizales	DOE Joint Genome Institute (JGI)	2761201800	17986	0.43	2675	0.148727	1.16075	Choiromyces venosus	Choiromyces	Ectomycorrhizal
79	Eukaryota	Permanent Draft	Sclerotinia homoeocarpa 04-21	Clarireedia homoeocarpa 04-21	4211	Ascomycota	Leotiomycetes	Helotiales		2502545044	43967	0.44	2775	0.0631155	2.37946	Clarireedia homoeocarpa	Clarireedia	-
80	Eukaryota	Permanent Draft	1000 Fungal Genomes	Classicula fluitans ATCC 64713 (P35)	1055	Basidiomycota	Classiculomycetes	Classiculales	DOE Joint Genome Institute (JGI)	2761201761	13270	0.49	2199	0.165712	1.18554	Classicula fluitans	Classicula	Fungal Parasite
81	Eukaryota	Permanent Draft	1000 Fungal Genomes	Clathrospora elynae CBS 161.51	543	Ascomycota	Dothideomycetes	Pleosporales	DOE Joint Genome Institute (JGI)	2761201766	13617	0.52	2744	0.201513	1.20736	Clathrospora elynae	Clathrospora	Plant pathogen
82	Eukaryota	Finished	Genome sequencing of Candida intermedia strains	Clavispora intermedia CBS 141442	8	Ascomycota	Saccharomycetes	Saccharomycetales	Chalmers University of Technology	2739368084	5931	0.44	2639	0.44495	1.15877	Clavispora intermedia	Clavispora	Animal Pathogen
83	Eukaryota	Permanent Draft	Candida (Clavispora) lusitaniae ATCC 42720	Clavispora lusitaniae ATCC 42720	9	Ascomycota	Saccharomycetes	Saccharomycetales	Broad Institute	648943105	6153	0.44	2583	0.419795	1.19086	Clavispora lusitaniae	Clavispora	Animal Pathogen
84	Eukaryota	Permanent Draft	1000 Fungal Genomes	Clavulina sp. PMI_390	587	Basidiomycota	Agaricomycetes	Cantharellales	DOE Joint Genome Institute (JGI)	2761201818	15442	0.51	2448	0.158529	1.27083	Clavulina sp.	Clavulina	Ectomycorrhizal
85	Eukaryota	Permanent Draft	1000 Fungal Genomes	Clohesyomyces aquaticus CBS 115471 Standard Draft	454	Ascomycota	Dothideomycetes	Pleosporales	DOE Joint Genome Institute (JGI)	2761201667	15810	0.5	2703	0.170968	1.27747	Clohesyomyces aquaticus	Clohesyomyces	-
86	Eukaryota	Permanent Draft	Coccidioides immitis RS	Coccidioides immitis RS	152	Ascomycota	Eurotiomycetes	Onygenales	Broad Institute	649077309	16160	0.45	4006	0.247896	1.58762	Coccidioides immitis	Coccidioides	Animal Pathogen-Soil Saprotroph
87	Eukaryota	Permanent Draft	Coccidioides posadasii strains Genome sequencing - Broad Institute	Coccidioides posadasii C735 delta SOWgp	55	Ascomycota	Eurotiomycetes	Onygenales	J. Craig Venter Institute (JCVI)	648943106	7255	0.47	2685	0.37009	1.16313	Coccidioides posadasii	Coccidioides	Animal Pathogen-Soil Saprotroph
88	Eukaryota	Permanent Draft	Phylogenomics and the origin and diversification of Kingdom Fungi	Coemansia reversa NRRL 1564	235	Zoopagomycota	Kickxellomycetes	Kickxellales	DOE Joint Genome Institute (JGI)	2761201611	7347	0.45	2019	0.274806	1.18623	Coemansia reversa	Coemansia	Undefined Saprotroph
89	Eukaryota	Permanent Draft	Forest soil microbial communities from France, Sweden and USA, for metatranscriptomics studies	Colletotrichum fioriniae MH 18 Standard Draft	255	Ascomycota	Sordariomycetes	Glomerellales	DOE Joint Genome Institute (JGI)	2761201827	15777	0.52	2818	0.178614	1.36693	Colletotrichum fioriniae	Colletotrichum	Endophyte-Plant Pathogen
90	Eukaryota	Permanent Draft	Forest soil microbial communities from France, Sweden and USA, for metatranscriptomics studies	Colletotrichum gloeosporioides 23 Standard Draft	87	Ascomycota	Sordariomycetes	Glomerellales	DOE Joint Genome Institute (JGI)	2761201856	18975	0.52	2866	0.151041	1.44068	Colletotrichum gloeosporioides	Colletotrichum	Endophyte-Plant Pathogen
91	Eukaryota	Permanent Draft	Phylogenomics and the origin and diversification of Kingdom Fungi	Conidiobolus coronatus NRRL 28638	926	Zoopagomycota	Entomophthoromycetes	Entomophthorales	DOE Joint Genome Institute (JGI)	2761201678	10635	0.28	1918	0.180348	1.32273	Conidiobolus coronatus	Conidiobolus	Animal Pathogen-Undefined Saprotroph
92	Eukaryota	Permanent Draft	1000 Fungal Genomes	Conidiobolus thromboides FSU 785	640	Zoopagomycota	Entomophthoromycetes	Entomophthorales	DOE Joint Genome Institute (JGI)	2761201809	8843	0.27	2013	0.227638	1.25832	Conidiobolus thromboides	Conidiobolus	Animal Pathogen
93	Eukaryota	Permanent Draft	Genome and transcriptome sequence of the inhibitor-tolerant Ascomycete Coniochaeta ligniaria NRRL30616	Coniochaeta ligniaria NRRL 30616	85	Ascomycota	Sordariomycetes	Coniochaetales	DOE Joint Genome Institute (JGI)	2761201604	13657	0.52	2715	0.198799	1.26851	Coniochaeta ligniaria	Coniochaeta	Lichen Parasite
94	Eukaryota	Permanent Draft	1000 Fungal Genomes	Coniochaeta sp. PMI_546	28	Ascomycota	Sordariomycetes	Coniochaetales	DOE Joint Genome Institute (JGI)	2761201790	11341	0.53	2698	0.237898	1.23202	Coniochaeta sp.	Coniochaeta	Animal Pathogen-Dung Saprotroph-Endophyte-Lichen Parasite-Plant Pathogen-Undefined Saprotroph
95	Eukaryota	Permanent Draft	SAP - Community proposal to sequence a diverse assemblage of saprotrophic Basidiomycota (Agaricomycotina)	Coniophora puteana RWD-64-598 SS2	154	Basidiomycota	Agaricomycetes	Boletales	DOE Joint Genome Institute (JGI)	2761201640	13761	0.52	2562	0.186178	1.36105	Coniophora puteana	Coniophora	Wood Saprotroph
96	Eukaryota	Permanent Draft	Functional genomics in the model mushroom Coprinopsis cinerea	Coprinopsis cinerea AmutBmut pab1-1	884	Basidiomycota	Agaricomycetes	Agaricales	DOE Joint Genome Institute (JGI)	2761201895	14242	0.52	2692	0.189018	1.26003	Coprinopsis cinerea	Coprinopsis	Undefined Saprotroph
97	Eukaryota	Permanent Draft	Fecal eukaryotic communites from dung pellets of Tule Elk in California, USA	Coprinopsis sclerotiger TEP 19c Standard Draft	244	Basidiomycota	Agaricomycetes	Agaricales	DOE Joint Genome Institute (JGI)	2761201858	12036	0.53	2679	0.222582	1.25159	Coprinopsis sclerotiger	Coprinopsis	Undefined Saprotroph
98	Eukaryota	Permanent Draft	Pennacchio R&D 2012 projects	Cortinarius glaucopus AT 2004 276	635	Basidiomycota	Agaricomycetes	Agaricales	DOE Joint Genome Institute (JGI)	2761201892	20377	0.44	2695	0.132257	1.26419	Cortinarius glaucopus	Cortinarius	Ectomycorrhizal
99	Eukaryota	Permanent Draft	1000 Fungal Genomes	Corynespora cassiicola Philippines	195	Ascomycota	Dothideomycetes	Pleosporales	DOE Joint Genome Institute (JGI)	2761201778	17166	0.51	2813	0.16387	1.34447	Corynespora cassiicola	Corynespora	Endophyte-Plant Pathogen
100	Eukaryota	Permanent Draft	Cronartium quercuum f.sp. fusiforme	Cronartium quercuum fusiforme G11	760	Basidiomycota	Pucciniomycetes	Pucciniales	DOE Joint Genome Institute (JGI)	2761201828	13903	0.41	2486	0.17881	1.16814	Cronartium quercuum	Cronartium	Plant Pathogen
101	Eukaryota	Permanent Draft	Genome sequencing of the chestnut blight fungus Cryphonectria parasitica	Cryphonectria parasitica EP155	18	Ascomycota	Sordariomycetes	Diaporthales	DOE Joint Genome Institute (JGI)	2761201844	11604	0.51	2615	0.225353	1.24971	Cryphonectria parasitica	Cryphonectria	Plant Pathogen
102	Eukaryota	Draft	Broad Cryptococcus genome sequencing	Cryptococcus amylolentus CBS 6273	18	Basidiomycota	Tremellomycetes	Tremellales	Broad Institute	2739368077	8409	0.53	2525	0.300274	1.16871	Cryptococcus amylolentus	Cryptococcus	Animal Pathogen
103	Eukaryota	Permanent Draft	Cryptococcus neoformans gattii WM276	Cryptococcus neoformans gattii sv. B WM276	14	Basidiomycota	Tremellomycetes	Tremellales	University of British Columbia	2739368092	6565	0.48	2526	0.384768	1.12985	Cryptococcus neoformans	Cryptococcus	Animal Pathogen
104	Eukaryota	Permanent Draft	1000 Fungal Genomes	Cucurbitaria berberidis CBS 394.84	26	Ascomycota	Dothideomycetes	Pleosporales	DOE Joint Genome Institute (JGI)	2761201874	12439	0.49	2756	0.221561	1.23295	Cucurbitaria berberidis	Cucurbitaria	Plant Pathogen-Wood Saprotroph
105	Eukaryota	Permanent Draft	1000 Fungal Genomes	Cutaneotrichosporon oleaginosus IBC0246	176	Basidiomycota	Tremellomycetes	Trichosporonales	DOE Joint Genome Institute (JGI)	2761201729	8313	0.61	2545	0.306147	1.15874	Cutaneotrichosporon oleaginosus	Cutaneotrichosporon	Animal Pathogen
106	Eukaryota	Permanent Draft	Cyberlindnera jadinii CBS1600	Cyberlindnera jadinii CBS1600	7	Ascomycota	Saccharomycetes	Saccharomycetales	Justus-Liebig-University Giessen	2739368110	5057	0.45	2000	0.395491	1.159	Cyberlindnera jadinii	Cyberlindnera	Animal Pathogen
107	Eukaryota	Permanent Draft	1000 Fungal Genomes	Cylindrobasidium torrendii FP15055 ss-10	1041	Basidiomycota	Agaricomycetes	Agaricales	DOE Joint Genome Institute (JGI)	2761201624	13940	0.52	2690	0.19297	1.30372	Cylindrobasidium torrendii	Cylindrobasidium	Undefined Saprotroph
108	Eukaryota	Permanent Draft	1000 Fungal Genomes	Cystobasidium minutum MCA 4210	32	Basidiomycota	Cystobasidiomycetes	Cystobasidiales	DOE Joint Genome Institute (JGI)	2761201797	7814	0.5	2293	0.293448	1.14261	Cystobasidium minutum	Cystobasidium	Fungal Parasite
109	Eukaryota	Permanent Draft	SAP - Community proposal to sequence a diverse assemblage of saprotrophic Basidiomycota (Agaricomycotina)	Dacryopinax primogenitus DJM-731 SS1	94	Basidiomycota	Dacrymycetes	Dacrymycetales	DOE Joint Genome Institute (JGI)	2761201728	10242	0.52	2419	0.236184	1.20463	Dacryopinax primogenitus	Dacryopinax	Wood Saprotroph
110	Eukaryota	Permanent Draft	Community proposal to sequence a diverse assemblage of saprotrophic Basidiomycota (Agaricomycotina)	Daedalea quercina L-15889	304	Basidiomycota	Agaricomycetes	Polyporales	DOE Joint Genome Institute (JGI)	2761201646	12199	0.55	2690	0.22051	1.23717	Daedalea quercina	Daedalea	Wood Saprotroph
111	Eukaryota	Finished	Debaryomyces hansenii var hansenii CBS767	Debaryomyces hansenii var. hansenii CBS767	7	Ascomycota	Saccharomycetes	Saccharomycetales	CEA Genoscope	638208605	6531	0.36	2686	0.411269	1.19695	Debaryomyces hansenii	Debaryomyces	Undefined Saprotroph
112	Eukaryota	Permanent Draft	1000 Fungal Genomes	Delitschia confertaspora ATCC 74209	734	Ascomycota	Dothideomycetes	Pleosporales	DOE Joint Genome Institute (JGI)	2761201791	10157	0.49	2710	0.266811	1.17417	Delitschia confertaspora	Delitschia	Dung Saprotroph
113	Eukaryota	Permanent Draft	1000 Fungal Genomes	Dendrothele bispora CBS 962.96	2766	Basidiomycota	Agaricomycetes	Agaricales	DOE Joint Genome Institute (JGI)	2761201764	33645	0.44	2742	0.081498	1.56309	Dendrothele bispora	Dendrothele	Undefined Saprotroph
114	Eukaryota	Permanent Draft	SAP - Community proposal to sequence a diverse assemblage of saprotrophic Basidiomycota (Agaricomycotina)	Dichomitus squalens LYAD-421 SS1	411	Basidiomycota	Agaricomycetes	Polyporales	DOE Joint Genome Institute (JGI)	2761201671	12290	0.56	2618	0.213019	1.29374	Dichomitus squalens	Dichomitus	Wood Saprotroph
115	Eukaryota	Permanent Draft	1000 Fungal Genomes	Didymella exigua CBS 183.55	146	Ascomycota	Dothideomycetes	Pleosporales	DOE Joint Genome Institute (JGI)	2761201834	12394	0.53	2774	0.223818	1.21377	Didymella exigua	Didymella	Animal Pathogen-Plant Pathogen-Undefined Saprotroph
116	Eukaryota	Permanent Draft	1000 Fungal Genomes	Didymosphaeria enalia CBS 304.66	305	Ascomycota	Dothideomycetes	Pleosporales	DOE Joint Genome Institute (JGI)	2761201781	13748	0.43	2782	0.202357	1.23149	Didymosphaeria enalia	Didymosphaeria	Endophyte-Lichen Parasite-Plant Pathogen-Undefined Saprotroph
117	Eukaryota	Permanent Draft	Fungal Genome Program Extremophiles	Dioszegia cryoxerica ANT03-071	735	Basidiomycota	Tremellomycetes	Tremellales	DOE Joint Genome Institute (JGI)	2761201864	15948	0.57	2539	0.159205	1.67861	Dioszegia cryoxerica	Dioszegia	Undefined Saprotroph
118	Eukaryota	Permanent Draft	1000 Fungal Genomes	Dissoconium aciculare CBS 342.82	48	Ascomycota	Dothideomycetes	Capnodiales	DOE Joint Genome Institute (JGI)	2761201851	10299	0.53	2634	0.255753	1.14806	Dissoconium aciculare	Dissoconium	Undefined Saprotroph
119	Eukaryota	Permanent Draft	1000 Fungal Genomes	Dothidotthia symphoricarpi CBS 119687	47	Ascomycota	Dothideomycetes	Pleosporales	DOE Joint Genome Institute (JGI)	2761201812	11790	0.48	2741	0.232485	1.20941	Dothidotthia symphoricarpi	Dothidotthia	Plant Pathogen
120	Eukaryota	Permanent Draft	Dothideomycete sequencing and comparative analysis	Dothistroma septosporum NZE10	20	Ascomycota	Dothideomycetes	Capnodiales	DOE Joint Genome Institute (JGI)	2761201631	12580	0.53	2738	0.217647	1.2195	Dothistroma septosporum	Dothistroma	Plant Pathogen
121	Eukaryota	Permanent Draft	1000 Fungal Genomes	Elmerina caryae L-13461	484	Basidiomycota	Agaricomycetes	Auriculariales	DOE Joint Genome Institute (JGI)	2761201776	16563	0.53	2693	0.162591	1.30004	Elmerina caryae	Elmerina	Undefined Saprotroph
122	Eukaryota	Finished	Eremothecium cymbalariae DBVPG#7215	Eremothecium cymbalariae DBVPG#7215	8	Ascomycota	Saccharomycetes	Saccharomycetales	Carlsberg Laboratory	2517287009	4585	0.4	2479	0.540676	1.1069	Eremothecium cymbalariae	Eremothecium	Plant Pathogen
123	Eukaryota	Finished	Eremothecium gossypii ATCC 10895	Eremothecium gossypii ATCC 10895	7	Ascomycota	Saccharomycetes	Saccharomycetales	University of Basel	638208607	4987	0.52	2636	0.528574	1.11115	Eremothecium gossypii	Eremothecium	Plant Pathogen
124	Eukaryota	Finished	Eremothecium sinecaudum ATCC 58844 genome sequencing	Eremothecium sinecaudum ATCC 58844	8	Ascomycota	Saccharomycetes	Saccharomycetales	Duke University	2751185714	5002	0.4	2587	0.517193	1.09741	Eremothecium sinecaudum	Eremothecium	Plant Pathogen
125	Eukaryota	Permanent Draft	Community proposal to sequence a diverse assemblage of saprotrophic Basidiomycota (Agaricomycotina)	Exidia glandulosa HHB12029	1412	Basidiomycota	Agaricomycetes	Auriculariales	DOE Joint Genome Institute (JGI)	2761201618	26765	0.57	2667	0.0996451	1.5613	Exidia glandulosa	Exidia	Endophyte-Undefined Saprotroph
126	Eukaryota	Permanent Draft	1000 Fungal Genomes	Exobasidium vaccinii MPITM	108	Basidiomycota	Exobasidiomycetes	Exobasidiales	DOE Joint Genome Institute (JGI)	2761201780	7453	0.44	2349	0.315175	1.1324	Exobasidium vaccinii	Exobasidium	Plant Pathogen
127	Eukaryota	Permanent Draft	Dothideomycete sequencing and comparative analysis	Exserohilum turcicum Et28A	137	Ascomycota	Dothideomycetes	Pleosporales	DOE Joint Genome Institute (JGI)	2761201737	11702	0.52	2733	0.23355	1.22503	Exserohilum turcicum	Exserohilum	Plant Pathogen
128	Eukaryota	Permanent Draft	Community proposal to sequence a diverse assemblage of saprotrophic Basidiomycota (Agaricomycotina)	Fibularhizoctonia sp. CBS 109695	1405	Basidiomycota	Agaricomycetes	Atheliales	DOE Joint Genome Institute (JGI)	2761201626	32946	0.52	2687	0.0815577	1.57127	Fibularhizoctonia sp.	Fibularhizoctonia	Undefined Saprotroph
129	Eukaryota	Permanent Draft	SAP - Community proposal to sequence a diverse assemblage of saprotrophic Basidiomycota (Agaricomycotina)	Fistulina hepatica ATCC 64428	472	Basidiomycota	Agaricomycetes	Agaricales	DOE Joint Genome Institute (JGI)	2761201746	11244	0.5	2630	0.233903	1.25513	Fistulina hepatica	Fistulina	Plant Pathogen-Wood Saprotroph
130	Eukaryota	Permanent Draft	SAP - Community proposal to sequence a diverse assemblage of saprotrophic Basidiomycota (Agaricomycotina)	Fomitiporia mediterranea MF3/22	281	Basidiomycota	Agaricomycetes	Hymenochaetales	DOE Joint Genome Institute (JGI)	2761201714	11333	0.41	2642	0.233125	1.26571	Fomitiporia mediterranea	Fomitiporia	Plant Pathogen-Undefined Saprotroph
131	Eukaryota	Permanent Draft	SAP - Community proposal to sequence a diverse assemblage of saprotrophic Basidiomycota (Agaricomycotina)	Fomitopsis pinicola FP-58527 SS1	480	Basidiomycota	Agaricomycetes	Polyporales	DOE Joint Genome Institute (JGI)	2761201739	13885	0.56	2685	0.193374	1.26071	Fomitopsis pinicola	Fomitopsis	Plant Pathogen-Wood Saprotroph
132	Eukaryota	Finished	Sequencing of the ascomycetous phytopathogenic fungus Fusarium fujikuroi.	Fusarium fujikuroi IMI 58289	12	Ascomycota	Sordariomycetes	Hypocreales	Helmholtz Zentrum Munchen	2739368116	15098	0.47	2899	0.192012	1.34874	Fusarium fujikuroi	Fusarium	Animal Pathogen-Endophyte-Lichen Parasite-Plant Pathogen-Soil Saprotroph-Wood Saprotroph
133	Eukaryota	Finished	Fusarium graminearum PH-1	Fusarium graminearum PH-1	39	Ascomycota	Sordariomycetes	Hypocreales	Broad Institute	640281006	11640	0.48	2750	0.236254	1.276	Fusarium graminearum	Fusarium	Plant Pathogen
134	Eukaryota	Permanent Draft	Nectria haematococca MPVI	Fusarium haematococca MPVI 77-13-4	197	Ascomycota	Sordariomycetes	Hypocreales	DOE Joint Genome Institute (JGI)	2761201757	15707	0.51	2793	0.177819	1.47619	Fusarium haematococca	Fusarium	Animal Pathogen-Endophyte-Lichen Parasite-Plant Pathogen-Soil Saprotroph-Wood Saprotroph
135	Eukaryota	Permanent Draft	Fusarium oxysporum lycopersici FGSC 4286	Fusarium oxysporum lycopersici 4287	114	Ascomycota	Sordariomycetes	Hypocreales	Broad Institute	2507525031	17425	0.48	2836	0.162755	1.54126	Fusarium oxysporum	Fusarium	Animal Pathogen-Endophyte-Plant Pathogen-Wood Saprotroph
136	Eukaryota	Permanent Draft	SAP - Community proposal to sequence a diverse assemblage of saprotrophic Basidiomycota (Agaricomycotina)	Ganoderma sp. 10597 SS1	131	Basidiomycota	Agaricomycetes	Polyporales	DOE Joint Genome Institute (JGI)	2761201663	12910	0.56	2688	0.208211	1.26972	Ganoderma sp.	Ganoderma	Plant Pathogen-Wood Saprotroph
137	Eukaryota	Permanent Draft	Gelatoporia subvermispora B	Gelatoporia subvermispora B	509	Basidiomycota	Agaricomycetes	Polyporales	DOE Joint Genome Institute (JGI)	2761201616	12125	0.54	2451	0.202144	1.26193	Gelatoporia subvermispora	Gelatoporia	Undefined Saprotroph
138	Eukaryota	Permanent Draft	SAP - Community proposal to sequence a diverse assemblage of saprotrophic Basidiomycota (Agaricomycotina)	Gloeophyllum trabeum ATCC 11539	352	Basidiomycota	Agaricomycetes	Gloeophyllales	DOE Joint Genome Institute (JGI)	2761201652	11846	0.53	2737	0.231048	1.26123	Gloeophyllum trabeum	Gloeophyllum	Wood Saprotroph
139	Eukaryota	Permanent Draft	Phylogenomics and the origin and diversification of Kingdom Fungi	Gonapodya prolifera JEL478	195	Chytridiomycota	Monoblepharidomycetes	Monoblepharidales	DOE Joint Genome Institute (JGI)	2761201736	13902	0.52	2162	0.155517	1.31545	Gonapodya prolifera	Gonapodya	-
140	Eukaryota	Permanent Draft	1000 Fungal Genomes	Guyanagaster necrorhiza MCA 3950	132	Basidiomycota	Agaricomycetes	Agaricales	DOE Joint Genome Institute (JGI)	2761201774	14276	0.46	2678	0.187588	1.29686	Guyanagaster necrorhiza	Guyanagaster	Wood Saprotroph
141	Eukaryota	Permanent Draft	1000 Fungal Genomes	Gymnascella aurantiaca NRRL 5967	292	Ascomycota	Eurotiomycetes	Onygenales	DOE Joint Genome Institute (JGI)	2761201865	9106	0.51	2656	0.291676	1.15211	Gymnascella aurantiaca	Gymnascella	Undefined Saprotroph
142	Eukaryota	Permanent Draft	1000 Fungal Genomes	Gymnascella citrina NRRL 5970	255	Ascomycota	Eurotiomycetes	Onygenales	DOE Joint Genome Institute (JGI)	2761201896	9779	0.52	2658	0.271807	1.15388	Gymnascella citrina	Gymnascella	Undefined Saprotroph
143	Eukaryota	Permanent Draft	1000 Fungal Genomes	Gymnopilus chrysopellus PR-1187	1764	Basidiomycota	Agaricomycetes	Agaricales	DOE Joint Genome Institute (JGI)	2761201823	18182	0.5	2692	0.148059	1.30795	Gymnopilus chrysopellus	Gymnopilus	Wood Saprotroph
144	Eukaryota	Permanent Draft	Genomics and transcriptomics of forest soil isolates	Gymnopus androsaceus JB14	1849	Basidiomycota	Agaricomycetes	Agaricales	DOE Joint Genome Institute (JGI)	2761201793	29331	0.45	2686	0.0915755	1.51862	Gymnopus androsaceus	Gymnopus	Undefined Saprotroph
145	Eukaryota	Permanent Draft	SAP - Community proposal to sequence a diverse assemblage of saprotrophic Basidiomycota (Agaricomycotina)	Gymnopus luxurians FD-317 M1	344	Basidiomycota	Agaricomycetes	Agaricales	DOE Joint Genome Institute (JGI)	2761201730	22057	0.45	2720	0.123317	1.38971	Gymnopus luxurians	Gymnopus	Undefined Saprotroph
146	Eukaryota	Permanent Draft	Exploring the Genome Diversity of Mycorrhizal Fungi to Understand the Evolution and Functioning of Symbiosis in Woody Shrubs and Trees	Gyrodon lividus BX	256	Basidiomycota	Agaricomycetes	Boletales	DOE Joint Genome Institute (JGI)	2761201822	11779	0.49	2650	0.224977	1.25698	Gyrodon lividus	Gyrodon	Ectomycorrhizal
147	Eukaryota	Permanent Draft	Yeasts of Biotechnological, Taxonomic and Physiological Interest	Hanseniaspora valbyensis NRRL Y-1626	639	Ascomycota	Saccharomycetes	Saccharomycetales	DOE Joint Genome Institute (JGI)	2761201857	4800	0.27	1593	0.331875	1.12555	Hanseniaspora valbyensis	Hanseniaspora	-
148	Eukaryota	Permanent Draft	Exploring the Genome Diversity of Mycorrhizal Fungi to Understand the Evolution and Functioning of Symbiosis in Woody Shrubs and Trees	Hebeloma cylindrosporum h7	172	Basidiomycota	Agaricomycetes	Agaricales	DOE Joint Genome Institute (JGI)	2761201656	15382	0.48	2685	0.174555	1.23985	Hebeloma cylindrosporum	Hebeloma	Ectomycorrhizal
149	Eukaryota	Permanent Draft	1000 Fungal Genomes	Hesseltinella vesiculosa NRRL 3301	91	Mucoromycota	Mucoromycetes	Mucorales	DOE Joint Genome Institute (JGI)	2761201702	11141	0.46	2375	0.213177	1.38442	Hesseltinella vesiculosa	Hesseltinella	Undefined Saprotroph
150	Eukaryota	Permanent Draft	Heterobasidion annosum TC 32-1 - Forest Pathogen basidiomycete WGS	Heterobasidion irregulare TC 32-1	14	Basidiomycota	Agaricomycetes	Russulales	DOE Joint Genome Institute (JGI)	2761201633	13383	0.52	2704	0.202047	1.25703	Heterobasidion irregulare	Heterobasidion	Wood Saprotroph
151	Eukaryota	Permanent Draft	1000 Fungal Genomes	Heterogastridium pycnidioideum ATCC MYA-4631 (P27)	83	Basidiomycota	Microbotryomycetes	Heterogastridiales	DOE Joint Genome Institute (JGI)	2761201814	7658	0.43	2208	0.288326	1.13542	Heterogastridium pycnidioideum	Heterogastridium	Fungal Parasite
152	Eukaryota	Permanent Draft	Histoplasma capsulatum NAm1	Histoplasma capsulatum NAm1	280	Ascomycota	Eurotiomycetes	Onygenales	Broad Institute	645666401	9402	0.46	2568	0.273133	1.19548	Histoplasma capsulatum	Histoplasma	Animal Pathogen-Dung Saprotroph
153	Eukaryota	Permanent Draft	Exploring the Genome Diversity of Mycorrhizal Fungi to Understand the Evolution and Functioning of Symbiosis in Woody Shrubs and Trees	Hyaloscypha variabilis F	78	Ascomycota	Leotiomycetes	Helotiales	DOE Joint Genome Institute (JGI)	2761201853	20389	0.48	2823	0.138457	1.44598	Hyaloscypha variabilis	Hyaloscypha	Undefined Saprotroph
154	Eukaryota	Permanent Draft	SAP - Community proposal to sequence a diverse assemblage of saprotrophic Basidiomycota (Agaricomycotina)	Hydnomerulius pinastri MD-312	529	Basidiomycota	Agaricomycetes	Boletales	DOE Joint Genome Institute (JGI)	2761201620	13270	0.51	2651	0.199774	1.26367	Hydnomerulius pinastri	Hydnomerulius	Wood Saprotroph
155	Eukaryota	Permanent Draft	SAP - Community proposal to sequence a diverse assemblage of saprotrophic Basidiomycota (Agaricomycotina)	Hypholoma sublateritium FD-334 SS-4	637	Basidiomycota	Agaricomycetes	Agaricales	DOE Joint Genome Institute (JGI)	2761201649	17911	0.51	2705	0.151025	1.3146	Hypholoma sublateritium	Hypholoma	Wood Saprotroph
156	Eukaryota	Permanent Draft	Yeasts of Biotechnological, Taxonomic and Physiological Interest	Hyphopichia burtonii NRRL Y-1933	25	Ascomycota	Saccharomycetes	Saccharomycetales	DOE Joint Genome Institute (JGI)	2761201661	6002	0.35	2604	0.433855	1.16859	Hyphopichia burtonii	Hyphopichia	-
157	Eukaryota	Permanent Draft	Endophytic fungal isolates - JBEI	Hypoxylon sp. CI-4A	211	Ascomycota	Sordariomycetes	Xylariales	DOE Joint Genome Institute (JGI)	2761201612	11712	0.48	2755	0.235229	1.22759	Hypoxylon sp.	Hypoxylon	Undefined Saprotroph
158	Eukaryota	Permanent Draft	Endophytic fungal isolates - JBEI	Hypoxylon sp. CO27-5	391	Ascomycota	Sordariomycetes	Xylariales	DOE Joint Genome Institute (JGI)	2761201630	12256	0.42	2763	0.225441	1.23525	Hypoxylon sp.	Hypoxylon	Undefined Saprotroph
159	Eukaryota	Permanent Draft	Endophytic fungal isolates - JBEI	Hypoxylon sp. EC38	101	Ascomycota	Sordariomycetes	Xylariales	DOE Joint Genome Institute (JGI)	2761201701	12534	0.41	2738	0.218446	1.23594	Hypoxylon sp.	Hypoxylon	Undefined Saprotroph
160	Eukaryota	Permanent Draft	Forest soil microbial communities from France, Sweden and USA, for metatranscriptomics studies	Ilyonectria europaea PMI-82	312	Ascomycota	Sordariomycetes	Hypocreales	DOE Joint Genome Institute (JGI)	2761201889	22250	0.51	2818	0.126652	1.56423	Ilyonectria europaea	Ilyonectria	Plant Pathogen
161	Eukaryota	Permanent Draft	SAP - Community proposal to sequence a diverse assemblage of saprotrophic Basidiomycota (Agaricomycotina)	Jaapia argillacea MUCL 33604	245	Basidiomycota	Agaricomycetes	Jaapiales	DOE Joint Genome Institute (JGI)	2761201657	16419	0.5	2720	0.165662	1.27904	Jaapia argillacea	Jaapia	Undefined Saprotroph
162	Eukaryota	Permanent Draft	1000 Fungal Genomes	Karstenula rhodostoma CBS 690.94	28	Ascomycota	Dothideomycetes	Pleosporales	DOE Joint Genome Institute (JGI)	2761201817	15043	0.48	2785	0.185136	1.27253	Karstenula rhodostoma	Karstenula	Undefined Saprotroph
163	Eukaryota	Finished	Kazachstania africana CBS 2517 Genome sequencing	Kazachstania africana CBS 2517	12	Ascomycota	Saccharomycetes	Saccharomycetales	Trinity College Dublin	2739368099	5649	0.36	2652	0.469464	1.22398	Kazachstania africana	Kazachstania	-
164	Eukaryota	Finished	Kazachstania naganishii CBS 8797 genome sequencing	Kazachstania naganishii CBS 8797	13	Ascomycota	Saccharomycetes	Saccharomycetales	Trinity College Dublin	2739368121	5488	0.46	2585	0.471028	1.2058	Kazachstania naganishii	Kazachstania	-
165	Eukaryota	Draft	The genome sequence of Kazachstania saulgeensis type strain CLIB 1764	Kazachstania saulgeensis CLIB1764	17	Ascomycota	Saccharomycetes	Saccharomycetales	National Institute for Agricultural Research (INRA)	2739368083	5532	0.33	2621	0.473789	1.22625	Kazachstania saulgeensis	Kazachstania	-
166	Eukaryota	Finished	Kluyveromyces lactis NRRL Y-1140	Kluyveromyces lactis NRRL Y-1140	6	Ascomycota	Saccharomycetes	Saccharomycetales	CEA Genoscope	638208608	5498	0.39	2683	0.487996	1.13753	Kluyveromyces lactis	Kluyveromyces	Undefined Saprotroph
167	Eukaryota	Permanent Draft	Kluyveromyces marxianus DMKU3-1042	Kluyveromyces marxianus DMKU3-1042	8	Ascomycota	Saccharomycetes	Saccharomycetales	National Institute of Technology and Evaluation	2739368108	5127	0.4	2629	0.512776	1.13199	Kluyveromyces marxianus	Kluyveromyces	Endophyte
168	Eukaryota	Permanent Draft	1000 Fungal Genomes	Kockovaella imperatae NRRL Y-17943 Standard Draft	35	Basidiomycota	Tremellomycetes	Tremellales	DOE Joint Genome Institute (JGI)	2761201711	7393	0.52	2495	0.337481	1.14509	Kockovaella imperatae	Kockovaella	Epiphyte
169	Eukaryota	Finished	Pichia pastoris GS115	Komagataella pastoris GS115	4	Ascomycota	Saccharomycetes	Saccharomycetales	Ghent University	645666419	5040	0.41	2604	0.516667	1.12135	Komagataella pastoris	Komagataella	-
170	Eukaryota	Finished	Komagataella phaffii CBS 7435	Komagataella phaffii CBS 7435	5	Ascomycota	Saccharomycetes	Saccharomycetales	University of Graz	2739368087	5477	0.41	2630	0.48019	1.1251	Komagataella phaffii	Komagataella	-
171	Eukaryota	Permanent Draft	Exploring the Genome Diversity of Mycorrhizal Fungi to Understand the Evolution and Functioning of Symbiosis in Woody Shrubs and Trees	Laccaria amethystina LaAM-08-1	1104	Basidiomycota	Agaricomycetes	Agaricales	DOE Joint Genome Institute (JGI)	2761201637	17553	0.47	2693	0.153421	1.28481	Laccaria amethystina	Laccaria	Ectomycorrhizal
172	Eukaryota	Permanent Draft	Laccaria bicolor	Laccaria bicolor S238N-H82	54	Basidiomycota	Agaricomycetes	Agaricales	DOE Joint Genome Institute (JGI)	2761201725	23130	0.47	2731	0.118072	1.39985	Laccaria bicolor	Laccaria	Ectomycorrhizal
173	Eukaryota	Finished	Lachancea thermotolerans CBS 6340	Lachancea thermotolerans CBS 6340	9	Ascomycota	Saccharomycetes	Saccharomycetales	CEA Genoscope, Institut Pasteur	645666411	5371	0.47	2704	0.503444	1.12796	Lachancea thermotolerans	Lachancea	Animal Pathogen
174	Eukaryota	Permanent Draft	Genomics and transcriptomics of forest soil isolates	Laetiporus sulphureus 93-53	335	Basidiomycota	Agaricomycetes	Polyporales	DOE Joint Genome Institute (JGI)	2761201684	13774	0.51	2678	0.194424	1.26923	Laetiporus sulphureus	Laetiporus	Wood Saprotroph
175	Eukaryota	Permanent Draft	Community proposal to sequence a diverse assemblage of saprotrophic Basidiomycota (Agaricomycotina)	Lentinus tigrinus ALCF2SS1-6	266	Basidiomycota	Agaricomycetes	Polyporales	DOE Joint Genome Institute (JGI)	2761201869	15581	0.56	2711	0.173994	1.30653	Lentinus tigrinus	Lentinus	Wood Saprotroph
176	Eukaryota	Permanent Draft	1000 Fungal Genomes	Lentithecium fluviatile CBS 122367	103	Ascomycota	Dothideomycetes	Pleosporales	DOE Joint Genome Institute (JGI)	2761201879	16742	0.48	2792	0.166766	1.26576	Lentithecium fluviatile	Lentithecium	-
177	Eukaryota	Permanent Draft	1000 Fungal Genomes	Lepidopterella palustris CBS 459.81	1484	Ascomycota	Dothideomycetes	Mytilinidiales	DOE Joint Genome Institute (JGI)	2761201683	13870	0.48	2748	0.198125	1.22125	Lepidopterella palustris	Lepidopterella	Undefined Saprotroph
178	Eukaryota	Permanent Draft	1000 Fungal Genomes	Leucogyrophana mollusca KUC20120723A-06	1174	Basidiomycota	Agaricomycetes	Boletales	DOE Joint Genome Institute (JGI)	2761201771	14619	0.52	2699	0.184623	1.26084	Leucogyrophana mollusca	Leucogyrophana	Lichen Parasite-Wood Saprotroph
179	Eukaryota	Permanent Draft	1000 Fungal Genomes	Leucosporidium creatinivorum 62-1032 Standard Draft	174	Basidiomycota	Microbotryomycetes	Leucosporidiales	DOE Joint Genome Institute (JGI)	2761201750	9854	0.59	2337	0.237163	1.21908	Leucosporidium creatinivorum	Leucosporidium	Soil Saprotroph
180	Eukaryota	Permanent Draft	1000 Fungal Genomes	Lichtheimia hyalospora FSU 10163	573	Mucoromycota	Mucoromycetes	Mucorales	DOE Joint Genome Institute (JGI)	2761201829	12062	0.41	2489	0.206351	1.57895	Lichtheimia hyalospora	Lichtheimia	Animal Pathogen
181	Eukaryota	Permanent Draft	1000 Fungal Genomes	Linderina pennispora ATCC 12442	208	Zoopagomycota	Kickxellomycetes	Kickxellales	DOE Joint Genome Institute (JGI)	2761201691	9351	0.54	2004	0.214309	1.34731	Linderina pennispora	Linderina	Undefined Saprotroph
182	Eukaryota	Permanent Draft	1000 Fungal Genomes	Lindra thalassiae JK4322	132	Ascomycota	Sordariomycetes	Lulworthiales	DOE Joint Genome Institute (JGI)	2761201894	8025	0.44	2544	0.317009	1.11242	Lindra thalassiae	Lindra	Undefined Saprotroph
183	Eukaryota	Draft	Yeasts of Biotechnological, Taxonomic and Physiological Interest	Lipomyces starkeyi NRRL Y11557	92	Ascomycota	Saccharomycetes	Saccharomycetales	DOE Joint Genome Institute (JGI)	2761201720	8192	0.47	2290	0.279541	1.1869	Lipomyces starkeyi	Lipomyces	-
184	Eukaryota	Permanent Draft	1000 Fungal Genomes	Lobosporangium transversale NRRL 3116 Standard Draft	131	Mucoromycota	Mortierellomycetes	Mortierellales	DOE Joint Genome Institute (JGI)	2761201609	11822	0.42	2335	0.197513	1.35974	Lobosporangium transversale	Lobosporangium	Undefined Saprotroph
185	Eukaryota	Permanent Draft	Lodderomyces elongisporus NRRL YB-4239	Lodderomyces elongisporus NRRL YB-4239	28	Ascomycota	Saccharomycetes	Saccharomycetales	Broad Institute	645666412	5905	0.37	2587	0.438103	1.19714	Lodderomyces elongisporus	Lodderomyces	Animal Pathogen
186	Eukaryota	Permanent Draft	1000 Fungal Genomes	Lophiostoma macrostomum CBS 122681	499	Ascomycota	Dothideomycetes	Pleosporales	DOE Joint Genome Institute (JGI)	2761201877	16160	0.52	2801	0.173329	1.29347	Lophiostoma macrostomum	Lophiostoma	Undefined Saprotroph
187	Eukaryota	Permanent Draft	1000 Fungal Genomes	Lophium mytilinum CBS 269.34	26	Ascomycota	Dothideomycetes	Mytilinidiales	DOE Joint Genome Institute (JGI)	2761201816	15153	0.5	2744	0.181086	1.24563	Lophium mytilinum	Lophium	Undefined Saprotroph
188	Eukaryota	Permanent Draft	Genomics and transcriptomics of forest soil isolates	Macrolepiota fuliginosa MF-IS2	2111	Basidiomycota	Agaricomycetes	Agaricales	DOE Joint Genome Institute (JGI)	2761201854	15801	0.48	2677	0.16942	1.28016	Macrolepiota fuliginosa	Macrolepiota	Soil Saprotroph
189	Eukaryota	Permanent Draft	1000 Fungal Genomes	Macroventuria anomochaeta CBS 525.71	71	Ascomycota	Dothideomycetes	Pleosporales	DOE Joint Genome Institute (JGI)	2761201799	12954	0.53	2749	0.212212	1.22154	Macroventuria anomochaeta	Macroventuria	-
190	Eukaryota	Permanent Draft	Malassezia globosa CBS 7966	Malassezia globosa CBS 7966	67	Basidiomycota	Malasseziomycetes	Malasseziales	Procter and Gamble	643280120	4286	0.52	2217	0.517266	1.1263	Malassezia globosa	Malassezia	Animal Pathogen
191	Eukaryota	Permanent Draft	1000 Fungal Genomes	Martensiomyces pterosporus CBS 209.56	482	Zoopagomycota	Kickxellomycetes	Kickxellales	DOE Joint Genome Institute (JGI)	2761201792	8435	0.56	2045	0.242442	1.24303	Martensiomyces pterosporus	Martensiomyces	Undefined Saprotroph
192	Eukaryota	Permanent Draft	1000 Fungal Genomes	Melanomma pulvis-pyrius CBS 109.77	1185	Ascomycota	Dothideomycetes	Pleosporales	DOE Joint Genome Institute (JGI)	2761201833	15881	0.51	2817	0.177382	1.30138	Melanomma pulvis-pyrius	Melanomma	Lichenized
193	Eukaryota	Permanent Draft	Exploring the Genome Diversity of Mycorrhizal Fungi to Understand the Evolution and Functioning of Symbiosis in Woody Shrubs and Trees	Meliniomyces bicolor E		Ascomycota	Leotiomycetes	Helotiales	DOE Joint Genome Institute (JGI)	2761201891	18619	0.39	2803	0.150545	1.34677	Meliniomyces bicolor	Meliniomyces	Ectomycorrhizal-Endophyte-Ericoid Mycorrhizal-Litter Saprotroph-Orchid Mycorrhizal
194	Eukaryota	Draft	Yeasts of Biotechnological, Taxonomic and Physiological Interest	Metschnikowia bicuspidata bicuspidata NRRL YB-4993	33	Ascomycota	Saccharomycetes	Saccharomycetales	DOE Joint Genome Institute (JGI)	2761201738	5851	0.48	2553	0.436336	1.14336	Metschnikowia bicuspidata	Metschnikowia	-
195	Eukaryota	Permanent Draft	Meyerozyma guilliermondii ATCC 6260	Meyerozyma guilliermondii ATCC 6260	9	Ascomycota	Saccharomycetes	Saccharomycetales	Broad Institute	645666418	6062	0.44	2616	0.431541	1.22898	Meyerozyma guilliermondii	Meyerozyma	Animal Pathogen
196	Eukaryota	Draft	Microbotryum intermedium Genome Sequencing	Microbotryum intermedium	24	Basidiomycota	Microbotryomycetes	Microbotryales	Ecologie Syst?matique & Evolution (ESE), University of Paris-Sud	2751185549	8142	0.56	2224	0.273152	1.1304	Microbotryum intermedium	Microbotryum	Plant Pathogen
197	Eukaryota	Permanent Draft	1000 Fungal Genomes	Microdochium bolleyi J235TASD1 Standard Draft	158	Ascomycota	Sordariomycetes	Xylariales	DOE Joint Genome Institute (JGI)	2761201731	13158	0.57	2731	0.207554	1.2651	Microdochium bolleyi	Microdochium	Plant Pathogen
198	Eukaryota	Permanent Draft	Arthroderma otae CBS 113480	Microsporum canis CBS 113480	17	Ascomycota	Eurotiomycetes	Onygenales	Broad Institute	648943104	8847	0.47	2682	0.303154	1.19165	Microsporum canis	Microsporum	Animal Pathogen
199	Eukaryota	Finished	Millerozyma farinosa CBS 7064 Genome sequencing	Millerozyma farinosa CBS 7064	14	Ascomycota	Saccharomycetes	Saccharomycetales	Genolevures Consortium	2739368088	11571	0.41	2669	0.230663	2.28363	Millerozyma farinosa	Millerozyma	Animal Pathogen
200	Eukaryota	Permanent Draft	Phylogenomics and the origin and diversification of Kingdom Fungi	Mixia osmundae IAM 14324	59	Basidiomycota	Mixiomycetes	Mixiales	DOE Joint Genome Institute (JGI)	2761201643	6903	0.56	1977	0.286397	1.10824	Mixia osmundae	Mixia	Undefined Saprotroph
201	Eukaryota	Permanent Draft	1000 Fungal Genomes	Monascus purpureus NRRL 1596	286	Ascomycota	Eurotiomycetes	Eurotiales	DOE Joint Genome Institute (JGI)	2761201903	8918	0.49	2673	0.299731	1.19865	Monascus purpureus	Monascus	Plant Pathogen-Undefined Saprotroph
202	Eukaryota	Finished	Moniliophthora perniciosa FA553	Moniliophthora perniciosa FA553	25056	Basidiomycota	Agaricomycetes	Agaricales	University of Campinas	645666413	13674	0.48	2253	0.164765	1.99157	Moniliophthora perniciosa	Moniliophthora	Plant Pathogen
203	Eukaryota	Permanent Draft	Draft genome sequence of Moniliophthora roreri CBS 138632	Moniliophthora roreri CBS 138632	2557	Basidiomycota	Agaricomycetes	Agaricales	Purdue University	2739368119	20050	0.47	2493	0.124339	1.36903	Moniliophthora roreri	Moniliophthora	Plant Pathogen
204	Eukaryota	Permanent Draft	1000 Fungal Genomes	Morchella importuna CCBAS932	357	Ascomycota	Pezizomycetes	Pezizales	DOE Joint Genome Institute (JGI)	2761201784	11600	0.47	2633	0.226983	1.16407	Morchella importuna	Morchella	Ectomycorrhizal-Undefined Saprotroph-Wood Saprotroph
205	Eukaryota	Permanent Draft	Forest soil microbial communities from France, Sweden and USA, for metatranscriptomics studies	Mortierella elongata AG-77 Standard Draft Annotated Standard Draft	387	Mucoromycota	Mortierellomycetes	Mortierellales	DOE Joint Genome Institute (JGI)	2761201748	14969	0.48	2449	0.163605	1.44998	Mortierella elongata	Mortierella	Endophyte-Litter Saprotroph-Soil Saprotroph-Undefined Saprotroph
206	Eukaryota	Permanent Draft	Fungal Program RND	Mucor circinelloides CBS 277.49	26	Mucoromycota	Mucoromycetes	Mucorales	DOE Joint Genome Institute (JGI)	2761201704	11719	0.42	2394	0.204284	1.55764	Mucor circinelloides	Mucor	Animal Pathogen-Plant Pathogen
207	Eukaryota	Permanent Draft	1000 Fungal Genomes	Myriangium duriaei CBS 260.36	16	Ascomycota	Dothideomycetes	Myriangiales	DOE Joint Genome Institute (JGI)	2761201832	10685	0.52	2680	0.250819	1.2347	Myriangium duriaei	Myriangium	Animal Pathogen
208	Eukaryota	Permanent Draft	Yeasts of Biotechnological, Taxonomic and Physiological Interest	Nadsonia fulvescens elongata DSM 6958	15	Ascomycota	Saccharomycetes	Saccharomycetales	DOE Joint Genome Institute (JGI)	2761201689	5657	0.39	2224	0.393141	1.18435	Nadsonia fulvescens	Nadsonia	-
209	Eukaryota	Permanent Draft	1000 Fungal Genomes	Naematelia encephala 68-887.2 Standard Draft	150	Basidiomycota	Tremellomycetes	Tremellales	DOE Joint Genome Institute (JGI)	2761201708	7964	0.49	2430	0.305123	1.17737	Naematelia encephala	Naematelia	-
210	Eukaryota	Permanent Draft	Fungal Genome Program Extremophiles	Naganishia vishniacii ANT03-052	48	Basidiomycota	Tremellomycetes	Filobasidiales	DOE Joint Genome Institute (JGI)	2761201900	7232	0.53	2301	0.318169	1.10648	Naganishia vishniacii	Naganishia	-
211	Eukaryota	Finished	Candida glabrata CBS 138	Nakaseomyces glabrata CBS 138	13	Ascomycota	Saccharomycetes	Saccharomycetales	CEA Genoscope, Institut Pasteur	638208603	5397	0.39	2627	0.486752	1.18957	Nakaseomyces glabrata	Nakaseomyces	Animal Pathogen
212	Eukaryota	Permanent Draft	Nannizzia gypsea CBS 118893	Nannizzia gypsea CBS 118893	19	Ascomycota	Eurotiomycetes	Onygenales	Broad Institute	648943103	9015	0.48	2713	0.300943	1.18393	Nannizzia gypsea	Nannizzia	-
213	Eukaryota	Permanent Draft	Naumovozyma castellii CBS 4309	Naumovozyma castellii CBS 4309	10	Ascomycota	Saccharomycetes	Saccharomycetales	Trinity College Dublin	2517093021	5870	0.37	2654	0.452129	1.25057	Naumovozyma castellii	Naumovozyma	-
214	Eukaryota	Permanent Draft	Naumovozyma dairenensis CBS 421	Naumovozyma dairenensis CBS 421	12	Ascomycota	Saccharomycetes	Saccharomycetales	Trinity College Dublin	2517093020	5816	0.34	2668	0.458735	1.24588	Naumovozyma dairenensis	Naumovozyma	-
215	Eukaryota	Permanent Draft	Transcriptomic Characterization of Anaerobic Gut Fungi	Neocallimastix californiae G1	702	Chytridiomycota	Neocallimastigomycetes	Neocallimastigales	DOE Joint Genome Institute (JGI)	2761201619	20219	0.18	1964	0.0971364	2.05244	Neocallimastix californiae	Neocallimastix	Animal Endosymbiont-Plant Saprotroph
216	Eukaryota	Permanent Draft	Neocallimastix sp. str. SC4 sequencing	Neocallimastix sp. SC4	13107	Chytridiomycota	Neocallimastigomycetes	Neocallimastigales	Prognosys Biosciences	2506783005	14084	0.33	2034	0.144419	2.14602	Neocallimastix sp.	Neocallimastix	Animal Endosymbiont-Plant Saprotroph
217	Eukaryota	Permanent Draft	Genomics and transcriptomics of forest soil isolates	Neolentinus lepideus HHB14362 ss-1	276	Basidiomycota	Agaricomycetes	Gloeophyllales	DOE Joint Genome Institute (JGI)	2761201677	13164	0.51	2718	0.206472	1.25239	Neolentinus lepideus	Neolentinus	Wood Saprotroph
218	Eukaryota	Permanent Draft	Connecting fungal phenotypes to genotypes in Neurospora crassa	Neurospora crassa 73 trp-3	299	Ascomycota	Sordariomycetes	Sordariales	DOE Joint Genome Institute (JGI)	2761201732	11978	0.49	2745	0.22917	1.14098	Neurospora crassa	Neurospora	Endophyte-Plant Pathogen-Undefined Saprotroph
219	Eukaryota	Permanent Draft	Neurospora	Neurospora tetrasperma FGSC 2508	53	Ascomycota	Sordariomycetes	Sordariales	DOE Joint Genome Institute (JGI)	2761201721	10380	0.49	2682	0.258382	1.13572	Neurospora tetrasperma	Neurospora	Undefined Saprotroph
220	Eukaryota	Permanent Draft	1000 Fungal Genomes	Obba rivulosa 3A-2	663	Basidiomycota	Agaricomycetes	Polyporales	DOE Joint Genome Institute (JGI)	2761201650	13206	0.54	2693	0.203922	1.25436	Obba rivulosa	Obba	Undefined Saprotroph
221	Eukaryota	Permanent Draft	Yeasts of Biotechnological, Taxonomic and Physiological Interest	Ogataea arabinofermentans NRRL YB-2248	55	Ascomycota	Saccharomycetes	Saccharomycetales	DOE Joint Genome Institute (JGI)	2761201709	5861	0.35	2279	0.388841	1.16981	Ogataea arabinofermentans	Ogataea	-
222	Eukaryota	Permanent Draft	Ogataea polymorpha NCYC 495 leu1.1	Ogataea polymorpha NCYC 495 leu1.1	7	Ascomycota	Saccharomycetes	Saccharomycetales	DOE Joint Genome Institute (JGI)	2761201648	5177	0.48	2215	0.427854	1.17562	Ogataea polymorpha	Ogataea	-
223	Eukaryota	Permanent Draft	Exploring the Genome Diversity of Mycorrhizal Fungi to Understand the Evolution and Functioning of Symbiosis in Woody Shrubs and Trees	Oidiodendron maius Zn	78	Ascomycota	Leotiomycetes	unclassified	DOE Joint Genome Institute (JGI)	2761201635	16703	0.47	2789	0.166976	1.436	Oidiodendron maius	Oidiodendron	Ericoid Mycorrhizal
224	Eukaryota	Permanent Draft	1000 Fungal Genomes	Ophiobolus disseminans CBS 113818	63	Ascomycota	Dothideomycetes	Pleosporales	DOE Joint Genome Institute (JGI)	2761201805	16027	0.52	2782	0.173582	1.25665	Ophiobolus disseminans	Ophiobolus	Undefined Saprotroph
225	Eukaryota	Permanent Draft	1000 Fungal Genomes	Panellus stipticus KUC8834	1457	Basidiomycota	Agaricomycetes	Agaricales	DOE Joint Genome Institute (JGI)	2761201798	15860	0.53	2681	0.169042	1.32376	Panellus stipticus	Panellus	Wood Saprotroph
226	Eukaryota	Permanent Draft	Cryptococcus flavescens OH182.9_3C genome	Papiliotrema flavescens OH182.9_3C	712	Basidiomycota	Tremellomycetes	Tremellales	Ohio Agricultural Research and Development Center, Ohio State University	2519899516	40074	0.58	2416	0.0602885	2.97185	Papiliotrema flavescens	Papiliotrema	-
227	Eukaryota	Permanent Draft	Paracoccidioides brasiliensis Pb01	Paracoccidioides brasiliensis Pb01	114	Ascomycota	Eurotiomycetes	Onygenales	Broad Institute	648943109	9254	0.43	2645	0.285822	1.15009	Paracoccidioides brasiliensis	Paracoccidioides	Animal Pathogen
228	Eukaryota	Permanent Draft	Genome-enabled Investigations of the Role of Secreted Proteins and Reactive Metabolites in Carbon Degradation by Pure and Mixed Ascomycete Fungal Communities	Paraphaeosphaeria sporulosa AP3s5-JAC2a	33	Ascomycota	Dothideomycetes	Pleosporales	DOE Joint Genome Institute (JGI)	2761201639	14745	0.53	2818	0.191116	1.29844	Paraphaeosphaeria sporulosa	Paraphaeosphaeria	Undefined Saprotroph
229	Eukaryota	Permanent Draft	Parastagonospora nodorum SN15	Parastagonospora nodorum SN15	108	Ascomycota	Dothideomycetes	Pleosporales	Broad Institute	645666417	16126	0.5	2854	0.176981	1.3143	Parastagonospora nodorum	Parastagonospora	-
230	Eukaryota	Permanent Draft	1000 Fungal Genomes	Patellaria atrata CBS 101060	89	Ascomycota	Dothideomycetes	Patellariales	DOE Joint Genome Institute (JGI)	2761201872	9794	0.46	2608	0.266285	1.16296	Patellaria atrata	Patellaria	-
231	Eukaryota	Permanent Draft	Paxillus involutus: Sequencing of the Genome of the Ectomycorrhizal Fungus	Paxillus involutus ATCC 200175	2551	Basidiomycota	Agaricomycetes	Boletales	DOE Joint Genome Institute (JGI)	2761201692	17968	0.5	2548	0.141808	1.27904	Paxillus involutus	Paxillus	Ectomycorrhizal
232	Eukaryota	Permanent Draft	Exploring the Genome Diversity of Mycorrhizal Fungi to Understand the Evolution and Functioning of Symbiosis in Woody Shrubs and Trees	Paxillus rubicundulus Ve08.2h10	1282	Basidiomycota	Agaricomycetes	Boletales	DOE Joint Genome Institute (JGI)	2761201665	18999	0.48	2661	0.14006	1.19767	Paxillus rubicundulus	Paxillus	Ectomycorrhizal
233	Eukaryota	Permanent Draft	Anaerobic fungi	Pecoramyces ruminatium C1A	16297	Chytridiomycota	Neocallimastigomycetes	Neocallimastigales	American Museum of Natural History	2510917007	14392	0.28	1522	0.105753	1.71222	Pecoramyces ruminatium	Pecoramyces	-
234	Eukaryota	Permanent Draft	Genome and transcriptome sequencing of phosphate-solubilizing Penicillium species to understand fungal contributions to the phosphorus cycle.	Penicillium bilaiae ATCC 20851	122	Ascomycota	Eurotiomycetes	Eurotiales	DOE Joint Genome Institute (JGI)	2761201871	13606	0.47	2736	0.201088	1.37792	Penicillium bilaiae	Penicillium	Dung Saprotroph-Undefined Saprotroph-Wood Saprotroph
235	Eukaryota	Permanent Draft	1000 Fungal Genomes	Penicillium brevicompactum 1011305	32	Ascomycota	Eurotiomycetes	Eurotiales	DOE Joint Genome Institute (JGI)	2761201835	11536	0.49	2755	0.238818	1.32595	Penicillium brevicompactum	Penicillium	Endophyte
236	Eukaryota	Permanent Draft	Genome and transcriptome sequencing of phosphate-solubilizing Penicillium species to understand fungal contributions to the phosphorus cycle.	Penicillium canescens ATCC 10419	57	Ascomycota	Eurotiomycetes	Eurotiales	DOE Joint Genome Institute (JGI)	2761201839	12374	0.49	2816	0.227574	1.36186	Penicillium canescens	Penicillium	Endophyte
237	Eukaryota	Permanent Draft	Penicillium chrysogenum Wisconsin 54-1255	Penicillium chrysogenum Wisconsin 54-1255	50	Ascomycota	Eurotiomycetes	Eurotiales	DSM	645666415	13052	0.49	2836	0.217285	1.33921	Penicillium chrysogenum	Penicillium	Plant Pathogen
238	Eukaryota	Permanent Draft	Genome and transcriptome sequencing of phosphate-solubilizing Penicillium species to understand fungal contributions to the phosphorus cycle.	Penicillium expansum ATCC 24692	10	Ascomycota	Eurotiomycetes	Eurotiales	DOE Joint Genome Institute (JGI)	2761201875	11807	0.47	2789	0.236216	1.33704	Penicillium expansum	Penicillium	Plant Pathogen
239	Eukaryota	Permanent Draft	Genome and transcriptome sequencing of phosphate-solubilizing Penicillium species to understand fungal contributions to the phosphorus cycle.	Penicillium fellutanum ATCC 48694	13	Ascomycota	Eurotiomycetes	Eurotiales	DOE Joint Genome Institute (JGI)	2761201855	11300	0.48	2753	0.243628	1.33055	Penicillium fellutanum	Penicillium	Dung Saprotroph-Undefined Saprotroph-Wood Saprotroph
240	Eukaryota	Permanent Draft	Genome and transcriptome sequencing of phosphate-solubilizing Penicillium species to understand fungal contributions to the phosphorus cycle.	Penicillium glabrum DAOM 239074	93	Ascomycota	Eurotiomycetes	Eurotiales	DOE Joint Genome Institute (JGI)	2761201838	12328	0.48	2725	0.221042	1.36624	Penicillium glabrum	Penicillium	Plant Pathogen
241	Eukaryota	Permanent Draft	Genome and transcriptome sequencing of phosphate-solubilizing Penicillium species to understand fungal contributions to the phosphorus cycle.	Penicillium janthinellum ATCC 10455	74	Ascomycota	Eurotiomycetes	Eurotiales	DOE Joint Genome Institute (JGI)	2761201762	12098	0.51	2764	0.228468	1.32019	Penicillium janthinellum	Penicillium	Dung Saprotroph-Undefined Saprotroph-Wood Saprotroph
242	Eukaryota	Permanent Draft	Genome and transcriptome sequencing of phosphate-solubilizing Penicillium species to understand fungal contributions to the phosphorus cycle.	Penicillium lanosocoeruleum ATCC 48919	11	Ascomycota	Eurotiomycetes	Eurotiales	DOE Joint Genome Institute (JGI)	2761201898	10698	0.49	2777	0.259581	1.30176	Penicillium lanosocoeruleum	Penicillium	Dung Saprotroph-Undefined Saprotroph-Wood Saprotroph
243	Eukaryota	Permanent Draft	Genome and transcriptome sequencing of phosphate-solubilizing Penicillium species to understand fungal contributions to the phosphorus cycle.	Penicillium raistrickii ATCC 10490	34	Ascomycota	Eurotiomycetes	Eurotiales	DOE Joint Genome Institute (JGI)	2761201808	11368	0.47	2802	0.246481	1.29229	Penicillium raistrickii	Penicillium	Endophyte
244	Eukaryota	Permanent Draft	1000 Fungal Genomes	Peniophora sp. CONT	971	Basidiomycota	Agaricomycetes	Russulales	DOE Joint Genome Institute (JGI)	2761201747	18952	0.54	2680	0.14141	1.37052	Peniophora sp.	Peniophora	Plant Pathogen-Wood Saprotroph
245	Eukaryota	Permanent Draft	Exploring the Genome Diversity of Mycorrhizal Fungi to Understand the Evolution and Functioning of Symbiosis in Woody Shrubs and Trees	Pezoloma ericae UAMH 7357	128	Ascomycota	Leotiomycetes	Helotiales	DOE Joint Genome Institute (JGI)	2761201801	16784	0.42	2782	0.165753	1.27786	Pezoloma ericae	Pezoloma	Bryophyte Parasite-Ectomycorrhizal-Ericoid Mycorrhizal
246	Eukaryota	Permanent Draft	Phanerochaete carnosa	Phanerochaete carnosa HHB-10118-sp	828	Basidiomycota	Agaricomycetes	Polyporales	DOE Joint Genome Institute (JGI)	2761201660	13937	0.53	2511	0.180168	1.35165	Phanerochaete carnosa	Phanerochaete	Wood Saprotroph
247	Eukaryota	Permanent Draft	Phanerochaete chrysosporium	Phanerochaete chrysosporium	157	Basidiomycota	Agaricomycetes	Polyporales	DOE Joint Genome Institute (JGI)	2761201668	13602	0.57	2690	0.197765	1.25688	Phanerochaete chrysosporium	Phanerochaete	Wood Saprotroph
248	Eukaryota	Permanent Draft	1000 Fungal Genomes	Phialocephala scopiformis CBS 120377	60	Ascomycota	Leotiomycetes	Helotiales	DOE Joint Genome Institute (JGI)	2761201605	18559	0.48	2852	0.153672	1.40919	Phialocephala scopiformis	Phialocephala	Endophyte
249	Eukaryota	Permanent Draft	Exploring the Genome Diversity of Mycorrhizal Fungi to Understand the Evolution and Functioning of Symbiosis in Woody Shrubs and Trees	Phlebia brevispora HHB-7030 SS6	1526	Basidiomycota	Agaricomycetes	Polyporales	DOE Joint Genome Institute (JGI)	2761201706	16170	0.52	2649	0.163822	1.34239	Phlebia brevispora	Phlebia	Wood Saprotroph
250	Eukaryota	Permanent Draft	Phlebiopsis gigantea	Phlebiopsis gigantea 11061_1 CR5-6	536	Basidiomycota	Agaricomycetes	Polyporales	DOE Joint Genome Institute (JGI)	2761201629	11891	0.55	2625	0.220755	1.25143	Phlebiopsis gigantea	Phlebiopsis	Undefined Saprotroph
251	Eukaryota	Permanent Draft	Fungal Program RND	Phycomyces blakesleeanus NRRL 1555 (-)	79	Mucoromycota	Mucoromycetes	Mucorales	DOE Joint Genome Institute (JGI)	2761201674	16528	0.36	2315	0.140065	1.48639	Phycomyces blakesleeanus	Phycomyces	Dung Saprotroph-Undefined Saprotroph
252	Eukaryota	Permanent Draft	1000 Fungal Genomes	Phyllosticta citriasiana CBS 120486	78	Ascomycota	Dothideomycetes	Botryosphaeriales	DOE Joint Genome Institute (JGI)	2761201802	11368	0.53	2669	0.234782	1.15924	Phyllosticta citriasiana	Phyllosticta	Endophyte-Plant Pathogen-Wood Saprotroph
253	Eukaryota	Permanent Draft	1000 Fungal Genomes	Phyllozyma linderae CBS 7893 (P93)	32	Basidiomycota	Spiculogloeomycetes	Spiculogloeales	DOE Joint Genome Institute (JGI)	2761201785	9062	0.68	2330	0.257118	1.15451	Phyllozyma linderae	Phyllozyma	-
254	Eukaryota	Draft	Pichia kudriavzevii Ckrusei653 genome sequencing	Pichia kudriavzevii Ckrusei653	11	Ascomycota	Saccharomycetes	Saccharomycetales	Broad Institute	2739368078	5130	0.38	1979	0.38577	1.15917	Pichia kudriavzevii	Pichia	Animal Pathogen
255	Eukaryota	Permanent Draft	Yeasts of Biotechnological, Taxonomic and Physiological Interest	Pichia membranifaciens NRRL Y-2026	11	Ascomycota	Saccharomycetes	Saccharomycetales	DOE Joint Genome Institute (JGI)	2761201688	5546	0.45	2121	0.382438	1.16737	Pichia membranifaciens	Pichia	Epiphyte-Plant Pathogen
256	Eukaryota	Permanent Draft	1000 Fungal Genomes	Piedraia hortae 480.64 Standard Draft	132	Ascomycota	Dothideomycetes	Capnodiales	DOE Joint Genome Institute (JGI)	2761201888	7572	0.52	2420	0.319599	1.10207	Piedraia hortae	Piedraia	Animal Pathogen
257	Eukaryota	Permanent Draft	Exploring the Genome Diversity of Mycorrhizal Fungi to Understand the Evolution and Functioning of Symbiosis in Woody Shrubs and Trees	Piloderma croceum F 1598	634	Basidiomycota	Agaricomycetes	Atheliales	DOE Joint Genome Institute (JGI)	2761201682	21583	0.46	2689	0.124589	1.28635	Piloderma croceum	Piloderma	Ectomycorrhizal
258	Eukaryota	Permanent Draft	Transcriptomic Characterization of Anaerobic Gut Fungi	Piromyces finnis Standard Draft	201	Chytridiomycota	Neocallimastigomycetes	Neocallimastigales	DOE Joint Genome Institute (JGI)	2761201681	10992	0.21	1891	0.172034	1.29508	Piromyces finnis	Piromyces	Animal Endosymbiont
259	Eukaryota	Permanent Draft	Pisolithus tinctorius and Pisolithus microcarpus	Pisolithus microcarpus 441	1000	Basidiomycota	Agaricomycetes	Boletales	DOE Joint Genome Institute (JGI)	2761201644	21064	0.49	2486	0.118021	1.24135	Pisolithus microcarpus	Pisolithus	Ectomycorrhizal
260	Eukaryota	Permanent Draft	Pisolithus tinctorius and Pisolithus microcarpus	Pisolithus tinctorius Marx 270	540	Basidiomycota	Agaricomycetes	Boletales	DOE Joint Genome Institute (JGI)	2761201735	22701	0.49	2569	0.113167	1.25613	Pisolithus tinctorius	Pisolithus	Ectomycorrhizal
261	Eukaryota	Permanent Draft	1000 Fungal Genomes	Plenodomus tracheiphilus IPT5	235	Ascomycota	Dothideomycetes	Pleosporales	DOE Joint Genome Institute (JGI)	2761201786	13209	0.51	2780	0.210463	1.23561	Plenodomus tracheiphilus	Plenodomus	Undefined Saprotroph
262	Eukaryota	Permanent Draft	1000 Fungal Genomes	Pleomassaria siparia CBS 279.74	112	Ascomycota	Dothideomycetes	Pleosporales	DOE Joint Genome Institute (JGI)	2761201849	13486	0.47	2749	0.203841	1.24445	Pleomassaria siparia	Pleomassaria	Undefined Saprotroph
263	Eukaryota	Permanent Draft	Pleurotus ostreatus	Pleurotus ostreatus N001 PC15	12	Basidiomycota	Agaricomycetes	Agaricales	DOE Joint Genome Institute (JGI)	2761201699	12330	0.51	2631	0.213382	1.28012	Pleurotus ostreatus	Pleurotus	Endophyte-Plant Pathogen-Wood Saprotroph
264	Eukaryota	Permanent Draft	SAP - Community proposal to sequence a diverse assemblage of saprotrophic Basidiomycota (Agaricomycotina)	Plicaturopsis crispa FD-325 SS-3	247	Basidiomycota	Agaricomycetes	Amylocorticiales	DOE Joint Genome Institute (JGI)	2761201627	13626	0.54	2722	0.199765	1.27002	Plicaturopsis crispa	Plicaturopsis	Wood Saprotroph
265	Eukaryota	Permanent Draft	Broad institute Pneumocystis genome sequencing	Pneumocystis carinii B80	62	Ascomycota	Pneumocystidomycetes	Pneumocystidales	Broad Institute	2739368111	3695	0.28	1768	0.478484	1.04581	Pneumocystis carinii	Pneumocystis	Animal Pathogen
266	Eukaryota	Permanent Draft	Broad institute Pneumocystis genome sequencing	Pneumocystis jirovecii RU7	70	Ascomycota	Pneumocystidomycetes	Pneumocystidales	Broad Institute	2739368103	3811	0.29	1722	0.45185	1.03891	Pneumocystis jirovecii	Pneumocystis	Animal Pathogen
267	Eukaryota	Finished	Podospora anserina S mat+	Podospora anserina S mat+		Ascomycota	Sordariomycetes	Sordariales	CEA Genoscope, University of Bordeaux 2, University of Lyon 1, Wageningen University	645666420	10760	0.52	2752	0.255762	1.2431	Podospora anserina	Podospora	Dung Saprotroph-Undefined Saprotroph
268	Eukaryota	Permanent Draft	1000 Fungal Genomes	Polychaeton citri CBS 116435	224	Ascomycota	Dothideomycetes	Capnodiales	DOE Joint Genome Institute (JGI)	2761201863	10582	0.52	2720	0.25704	1.19191	Polychaeton citri	Polychaeton	Undefined Saprotroph
269	Eukaryota	Permanent Draft	1000 Fungal Genomes	Polyplosphaeria fusca CBS 125425	436	Ascomycota	Dothideomycetes	Pleosporales	DOE Joint Genome Institute (JGI)	2761201803	15194	0.53	2780	0.182967	1.2554	Polyplosphaeria fusca	Polyplosphaeria	Undefined Saprotroph
270	Eukaryota	Permanent Draft	Genomics and transcriptomics of forest soil isolates	Polyporus arcularius HHB13444	2265	Basidiomycota	Agaricomycetes	Polyporales	DOE Joint Genome Institute (JGI)	2761201884	17525	0.57	2701	0.154123	1.29767	Polyporus arcularius	Polyporus	Wood Saprotroph
271	Eukaryota	Permanent Draft	Postia placenta MAD-698-R-SB12 Whole genome shotgun sequencing	Postia placenta MAD-698-R-SB12	328	Basidiomycota	Agaricomycetes	Polyporales	DOE Joint Genome Institute (JGI)	2761201846	12541	0.54	2616	0.208596	1.23509	Postia placenta	Postia	Wood Saprotroph
272	Eukaryota	Permanent Draft	1000 Fungal Genomes	Protomyces lactucaedebilis 12-1054 Standard Draft	42	Ascomycota	Taphrinomycetes	Taphrinales	DOE Joint Genome Institute (JGI)	2761201651	6726	0.51	2190	0.325602	1.10594	Protomyces lactucaedebilis	Protomyces	Plant Pathogen
273	Eukaryota	Permanent Draft	Mycosphaerella fijiensis, Cercospora zeae-maydis and Cercospora beticola	Pseudocercospora fijiensis CIRAD86	27	Ascomycota	Dothideomycetes	Capnodiales	DOE Joint Genome Institute (JGI)	2761201873	13107	0.45	2805	0.214008	1.24385	Pseudocercospora fijiensis	Pseudocercospora	Plant Pathogen
274	Eukaryota	Permanent Draft	1000 Fungal Genomes	Pseudomassariella vexata CBS 129021 Standard Draft	36	Ascomycota	Sordariomycetes	Xylariales	DOE Joint Genome Institute (JGI)	2761201749	12565	0.51	2768	0.220294	1.27132	Pseudomassariella vexata	Pseudomassariella	-
275	Eukaryota	Permanent Draft	1000 Fungal Genomes	Pseudovirgaria hyperparasitica CBS 121739	99	Ascomycota	Dothideomycetes	Acrospermales	DOE Joint Genome Institute (JGI)	2761201815	11232	0.48	2687	0.239227	1.20729	Pseudovirgaria hyperparasitica	Pseudovirgaria	-
276	Eukaryota	Permanent Draft	SAP - Community proposal to sequence a diverse assemblage of saprotrophic Basidiomycota (Agaricomycotina)	Punctularia strigosozonata HHB-11173 SS5	177	Basidiomycota	Agaricomycetes	Corticiales	DOE Joint Genome Institute (JGI)	2761201712	11538	0.55	2612	0.226382	1.27106	Punctularia strigosozonata	Punctularia	Undefined Saprotroph
277	Eukaryota	Permanent Draft	Genome-enabled Investigations of the Role of Secreted Proteins and Reactive Metabolites in Carbon Degradation by Pure and Mixed Ascomycete Fungal Communities	Pyrenochaeta sp. DS3sAY3a	65	Ascomycota	Dothideomycetes	Pleosporales	DOE Joint Genome Institute (JGI)	2761201700	14995	0.51	2799	0.186662	1.32226	Pyrenochaeta sp.	Pyrenochaeta	Undefined Saprotroph-Wood Saprotroph
278	Eukaryota	Permanent Draft	Pyrenophora tritici-repentis Pt-1C-BFP	Pyrenophora tritici-repentis Pt-1C-BFP	48	Ascomycota	Dothideomycetes	Pleosporales	Broad Institute	645666422	12298	0.51	2757	0.224183	1.28836	Pyrenophora tritici-repentis	Pyrenophora	Plant Pathogen
279	Eukaryota	Permanent Draft	Magnaporthe grisea 70-15	Pyricularia oryzae 70-15	183	Ascomycota	Sordariomycetes	Magnaporthales	Broad Institute	640281007	13146	0.52	2745	0.208809	1.29545	Pyricularia oryzae	Pyricularia	Plant Pathogen
280	Eukaryota	Permanent Draft	Genomics and transcriptomics of forest soil isolates	Ramaria acris UT-36052-T	979	Basidiomycota	Agaricomycetes	Gomphales	DOE Joint Genome Institute (JGI)	2761201760	19287	0.46	2673	0.138591	1.29704	Ramaria acris	Ramaria	Ectomycorrhizal
281	Eukaryota	Permanent Draft	1000 Fungal Genomes	Ramicandelaber brevisporus CBS 109374	1144	Zoopagomycota	unclassified	Ramicandelaberales	DOE Joint Genome Institute (JGI)	2761201783	9281	0.49	1781	0.191897	1.28467	Ramicandelaber brevisporus	Ramicandelaber	Undefined Saprotroph
282	Eukaryota	Permanent Draft	Rhizophagus irregularis DAOM 197198	Rhizophagus irregularis DAOM 197198	20288	Mucoromycota	Glomeromycetes	Glomerales	DOE Joint Genome Institute (JGI)	2761201742	30282	0.28	2213	0.0730797	1.23814	Rhizophagus irregularis	Rhizophagus	Arbuscular Mycorrhizal
283	Eukaryota	Permanent Draft	Rhizopogon salebrosus	Rhizopogon salebrosus TDB-379 Standard Draft	1837	Basidiomycota	Agaricomycetes	Boletales	DOE Joint Genome Institute (JGI)	2761201789	18900	0.49	2638	0.139577	1.25663	Rhizopogon salebrosus	Rhizopogon	Ectomycorrhizal
284	Eukaryota	Permanent Draft	1000 Fungal Genomes	Rhizopogon vinicolor AM-OR11-026	1949	Basidiomycota	Agaricomycetes	Boletales	DOE Joint Genome Institute (JGI)	2761201617	14469	0.48	2645	0.182805	1.24008	Rhizopogon vinicolor	Rhizopogon	Ectomycorrhizal
285	Eukaryota	Permanent Draft	Fungal endosymbiont bacterial communities from various locations	Rhizopus microsporus ATCC52814 Standard Draft	516	Mucoromycota	Mucoromycetes	Mucorales	DOE Joint Genome Institute (JGI)	2761201724	11502	0.37	2299	0.199878	1.37843	Rhizopus microsporus	Rhizopus	Plant Pathogen
286	Eukaryota	Permanent Draft	Rhodotorula graminis WP1	Rhodotorula graminis WP1	23	Basidiomycota	Microbotryomycetes	Sporidiobolales	DOE Joint Genome Institute (JGI)	2761201694	7283	0.68	2204	0.302623	1.12976	Rhodotorula graminis	Rhodotorula	Animal Endosymbiont-Animal Pathogen-Endophyte-Plant Pathogen-Undefined Saprotroph
287	Eukaryota	Permanent Draft	Genomic basis of thermal adaption and carbon metabolism in permafrost isolates	Rhodotorula sp. JG-1b	143	Basidiomycota	Microbotryomycetes	Sporidiobolales	DOE Joint Genome Institute (JGI)	2761201717	6680	0.61	2190	0.327844	1.11416	Rhodotorula sp.	Rhodotorula	Animal Endosymbiont-Animal Pathogen-Endophyte-Plant Pathogen-Undefined Saprotroph
288	Eukaryota	Permanent Draft	1000 Fungal Genomes	Saccharata proteae CBS 121410	170	Ascomycota	Dothideomycetes	Botryosphaeriales	DOE Joint Genome Institute (JGI)	2761201813	9234	0.54	2668	0.288932	1.18478	Saccharata proteae	Saccharata	Endophyte
289	Eukaryota	Permanent Draft	Saccharomyces cerevisiae AWRI1631	Saccharomyces cerevisiae AWRI1631	2484	Ascomycota	Saccharomycetes	Saccharomycetales	The Australian Wine Research Institute	643280122	5451	0.38	2331	0.427628	1.34449	Saccharomyces cerevisiae	Saccharomyces	Undefined Saprotroph
290	Eukaryota	Permanent Draft	Yeasts of Biotechnological, Taxonomic and Physiological Interest	Saitoella complicata NRRL Y-17804	35	Ascomycota	unclassified	unclassified	DOE Joint Genome Institute (JGI)	2761201666	7034	0.53	2429	0.345323	1.12598	Saitoella complicata	Saitoella	-
291	Eukaryota	Permanent Draft	Sanghuangporus baumii 821 genome sequencing	Sanghuangporus baumii 821	217	Basidiomycota	Agaricomycetes	Hymenochaetales	China University of Petroleum (East China)	2739368096	8455	0.48	1919	0.226966	1.1605	Sanghuangporus baumii	Sanghuangporus	-
292	Eukaryota	Permanent Draft	Pichia stipitis	Scheffersomyces stipitis CBS 6054	9	Ascomycota	Saccharomycetes	Saccharomycetales	DOE Joint Genome Institute (JGI)	2761201758	5807	0.41	2682	0.461856	1.19836	Scheffersomyces stipitis	Scheffersomyces	Animal Endosymbiont-Undefined Saprotroph
293	Eukaryota	Permanent Draft	Schizophyllum commune	Schizophyllum commune H4-8	36	Basidiomycota	Agaricomycetes	Agaricales	DOE Joint Genome Institute (JGI)	2761201859	16319	0.58	2723	0.166861	1.31583	Schizophyllum commune	Schizophyllum	Animal Pathogen-Endophyte-Wood Saprotroph
294	Eukaryota	Permanent Draft	1000 Fungal Genomes	Schizopora paradoxa KUC8140	1149	Basidiomycota	Agaricomycetes	Hymenochaetales	DOE Joint Genome Institute (JGI)	2761201726	17098	0.49	2693	0.157504	1.25139	Schizopora paradoxa	Schizopora	Wood Saprotroph
295	Eukaryota	Permanent Draft	Schizosaccharomyces japonicus yFS275	Schizosaccharomyces japonicus yFS275	20	Ascomycota	Schizosaccharomycetes	Schizosaccharomycetales	Broad Institute	645666423	5227	0.44	2321	0.444041	1.17966	Schizosaccharomyces japonicus	Schizosaccharomyces	Undefined Saprotroph
296	Eukaryota	Finished	Schizosaccharomyces pombe 972h-	Schizosaccharomyces pombe 972h-	4	Ascomycota	Schizosaccharomycetes	Schizosaccharomycetales	Cold Spring Harbor Laboratory, Wellcome Trust Sanger Institute	638208610	5315	0.36	2464	0.463594	1.20576	Schizosaccharomyces pombe	Schizosaccharomyces	Undefined Saprotroph
297	Eukaryota	Permanent Draft	Exploring the Genome Diversity of Mycorrhizal Fungi to Understand the Evolution and Functioning of Symbiosis in Woody Shrubs and Trees	Scleroderma citrinum Foug A	758	Basidiomycota	Agaricomycetes	Boletales	DOE Joint Genome Institute (JGI)	2761201672	21012	0.49	2593	0.123406	1.23448	Scleroderma citrinum	Scleroderma	Ectomycorrhizal
298	Eukaryota	Finished	Sclerotinia sclerotiorum 1980 UF-70 genome sequencing	Sclerotinia sclerotiorum 1980 UF-70	16	Ascomycota	Leotiomycetes	Helotiales	Curtin University	2739368080	11370	0.42	2785	0.244943	1.18851	Sclerotinia sclerotiorum	Sclerotinia	Plant Pathogen
299	Eukaryota	Permanent Draft	Exploring the Genome Diversity of Mycorrhizal Fungi to Understand the Evolution and Functioning of Symbiosis in Woody Shrubs and Trees	Serendipita vermifera MAFF 305830	516	Basidiomycota	Agaricomycetes	Sebacinales	DOE Joint Genome Institute (JGI)	2761201707	15312	0.49	2440	0.159352	1.27295	Serendipita vermifera	Serendipita	Orchid Mycorrhizal
300	Eukaryota	Permanent Draft	Serpula lacrymans	Serpula lacrymans lacrymans S7.3	679	Basidiomycota	Agaricomycetes	Boletales	DOE Joint Genome Institute (JGI)	2761201601	14495	0.45	2537	0.175026	1.2231	Serpula lacrymans	Serpula	Wood Saprotroph
301	Eukaryota	Permanent Draft	Community proposal to sequence a diverse assemblage of saprotrophic Basidiomycota (Agaricomycotina)	Sistotremastrum niveocremeum HHB9708 ss-1	208	Basidiomycota	Agaricomycetes	Trechisporales	DOE Joint Genome Institute (JGI)	2761201647	13080	0.49	2584	0.197554	1.2322	Sistotremastrum niveocremeum	Sistotremastrum	Undefined Saprotroph
302	Eukaryota	Permanent Draft	Community proposal to sequence a diverse assemblage of saprotrophic Basidiomycota (Agaricomycotina)	Sistotremastrum suecicum HHB10207 ss-3	914	Basidiomycota	Agaricomycetes	Trechisporales	DOE Joint Genome Institute (JGI)	2761201687	13657	0.49	2609	0.191038	1.22806	Sistotremastrum suecicum	Sistotremastrum	Undefined Saprotroph
303	Eukaryota	Permanent Draft	Fungal Genome Program Extremophiles	Sodiomyces alkalinus F11	24	Ascomycota	Sordariomycetes	Glomerellales	DOE Joint Genome Institute (JGI)	2761201850	9411	0.49	2644	0.280948	1.13275	Sodiomyces alkalinus	Sodiomyces	-
304	Eukaryota	Permanent Draft	Yeast-based biofuel production - 2 xylose fermenting fungi	Spathaspora passalidarum NRRL Y-27907	8	Ascomycota	Saccharomycetes	Saccharomycetales	DOE Joint Genome Institute (JGI)	2761201755	5983	0.37	2650	0.442922	1.18566	Spathaspora passalidarum	Spathaspora	-
305	Eukaryota	Permanent Draft	SAP - Community proposal to sequence a diverse assemblage of saprotrophic Basidiomycota (Agaricomycotina)	Sphaerobolus stellatus SS14	1280	Basidiomycota	Agaricomycetes	Geastrales	DOE Joint Genome Institute (JGI)	2761201664	35274	0.44	2467	0.0699382	1.53141	Sphaerobolus stellatus	Sphaerobolus	Undefined Saprotroph
306	Eukaryota	Permanent Draft	Dothideomycete sequencing and comparative analysis	Sphaerulina musiva SO2202	40	Ascomycota	Dothideomycetes	Capnodiales	DOE Joint Genome Institute (JGI)	2761201719	10233	0.51	2747	0.268445	1.19257	Sphaerulina musiva	Sphaerulina	Lichenized
307	Eukaryota	Permanent Draft	Spizellomyces punctatus DAOM BR117	Spizellomyces punctatus DAOM BR117	38	Chytridiomycota	Chytridiomycetes	Spizellomycetales	Broad Institute	2507525034	8779	0.48	2469	0.281239	1.18834	Spizellomyces punctatus	Spizellomyces	Undefined Saprotroph
308	Eukaryota	Finished	Sporisorium reilianum f. sp. reilianum SRS1_H2-8 genome sequencing	Sporisorium reilianum f. sp. reilianum SRS1_H2-8	23	Basidiomycota	Ustilaginomycetes	Ustilaginales	Technical University of Munich	2802429437	6811	0.6	2505	0.367787	1.10579	Sporisorium reilianum	Sporisorium	Plant Pathogen
309	Eukaryota	Permanent Draft	Sporobolomyces roseus	Sporobolomyces roseus IAM 13481	63	Basidiomycota	Microbotryomycetes	Sporidiobolales	DOE Joint Genome Institute (JGI)	2761201901	5536	0.54	1862	0.336344	1.12513	Sporobolomyces roseus	Sporobolomyces	Fungal Parasite-Litter Saprotroph
310	Eukaryota	Permanent Draft	1000 Fungal Genomes	Sporormia fimetaria CBS 119925	122	Ascomycota	Dothideomycetes	Pleosporales	DOE Joint Genome Institute (JGI)	2761201860	10783	0.54	2639	0.244737	1.15877	Sporormia fimetaria	Sporormia	Dung Saprotroph
311	Eukaryota	Permanent Draft	Genome-enabled Investigations of the Role of Secreted Proteins and Reactive Metabolites in Carbon Degradation by Pure and Mixed Ascomycete Fungal Communities	Stagonospora sp. SRC1lsM3a	42	Ascomycota	Dothideomycetes	Pleosporales	DOE Joint Genome Institute (JGI)	2761201675	14430	0.52	2801	0.194109	1.29704	Stagonospora sp.	Stagonospora	Plant Pathogen
312	Eukaryota	Permanent Draft	SAP - Community proposal to sequence a diverse assemblage of saprotrophic Basidiomycota (Agaricomycotina)	Stereum hirsutum FP-91666 SS1	139	Basidiomycota	Agaricomycetes	Russulales	DOE Joint Genome Institute (JGI)	2761201713	14072	0.51	2706	0.192297	1.35772	Stereum hirsutum	Stereum	Wood Saprotroph
313	Eukaryota	Permanent Draft	1000 Fungal Genomes	Sterigmatomyces hyphaenes ATCC MYA-4628 (P8)	97	Basidiomycota	Agaricostilbomycetes	Agaricostilbales	DOE Joint Genome Institute (JGI)	2761201775	7746	0.54	2257	0.291376	1.13469	Sterigmatomyces hyphaenes	Sterigmatomyces	-
314	Eukaryota	Finished	Sugiyamaella lignohabitans CBS 10342 genome sequencing	Sugiyamaella lignohabitans CBS10342	5	Ascomycota	Saccharomycetes	Saccharomycetales	University of Natural Resources and Life Sciences Vienna	2739368090	5388	0.45	1924	0.35709	1.13565	Sugiyamaella lignohabitans	Sugiyamaella	-
315	Eukaryota	Permanent Draft	Yeasts of Biotechnological, Taxonomic and Physiological Interest	Suhomyces tanzawaensis NRRL Y-17324	16	Ascomycota	Saccharomycetes	Saccharomycetales	DOE Joint Genome Institute (JGI)	2761201740	5895	0.45	2603	0.441561	1.15444	Suhomyces tanzawaensis	Suhomyces	-
316	Eukaryota	Permanent Draft	1000 Fungal Genomes	Suillus brevipes Sb2	1306	Basidiomycota	Agaricomycetes	Boletales	DOE Joint Genome Institute (JGI)	2761201602	21458	0.48	2678	0.124802	1.28902	Suillus brevipes	Suillus	Ectomycorrhizal
317	Eukaryota	Permanent Draft	Exploring the Genome Diversity of Mycorrhizal Fungi to Understand the Evolution and Functioning of Symbiosis in Woody Shrubs and Trees	Suillus luteus UH-Slu-Lm8-n1	62	Basidiomycota	Agaricomycetes	Boletales	DOE Joint Genome Institute (JGI)	2761201603	16588	0.48	2658	0.160236	1.25734	Suillus luteus	Suillus	Ectomycorrhizal
318	Eukaryota	Permanent Draft	Phylogenomics and the origin and diversification of Kingdom Fungi	Symbiotaphrina kochii CBS 250.77	48	Ascomycota	Xylonomycetes	Symbiotaphrinales	DOE Joint Genome Institute (JGI)	2761201845	10482	0.52	2704	0.257966	1.25296	Symbiotaphrina kochii	Symbiotaphrina	Animal Endosymbiont
319	Eukaryota	Permanent Draft	1000 Fungal Genomes	Syncephalastrum racemosum NRRL 2496 Standard Draft	39	Mucoromycota	Mucoromycetes	Mucorales	DOE Joint Genome Institute (JGI)	2761201625	11124	0.47	2474	0.222402	1.42118	Syncephalastrum racemosum	Syncephalastrum	Undefined Saprotroph
320	Eukaryota	Permanent Draft	Genome and transcriptome sequencing of phosphate-solubilizing Penicillium species to understand fungal contributions to the phosphorus cycle.	Talaromyces aculeatus ATCC 10409	40	Ascomycota	Eurotiomycetes	Eurotiales	DOE Joint Genome Institute (JGI)	2761201806	13793	0.47	2787	0.202059	1.42088	Talaromyces aculeatus	Talaromyces	Undefined Saprotroph
321	Eukaryota	Permanent Draft	Penicillium marneffei ATCC 18224	Talaromyces marneffei ATCC 18224	453	Ascomycota	Eurotiomycetes	Eurotiales	J. Craig Venter Institute (JCVI)	645666416	10804	0.47	2812	0.260274	1.40896	Talaromyces marneffei	Talaromyces	Animal Pathogen
322	Eukaryota	Permanent Draft	Talaromyces stipitatus ATCC 10500	Talaromyces stipitatus ATCC 10500	820	Ascomycota	Eurotiomycetes	Eurotiales	J. Craig Venter Institute (JCVI)	645666425	13356	0.46	2762	0.206798	1.46307	Talaromyces stipitatus	Talaromyces	Undefined Saprotroph
323	Eukaryota	Permanent Draft	1000 Fungal Genomes	Teratosphaeria nubilosa CBS 116005	191	Ascomycota	Dothideomycetes	Capnodiales	DOE Joint Genome Institute (JGI)	2761201824	10998	0.53	2698	0.245317	1.19088	Teratosphaeria nubilosa	Teratosphaeria	Plant Pathogen-Wood Saprotroph
324	Eukaryota	Finished	Tetrapisispora blattae CBS 6284 genome sequencing	Tetrapisispora blattae CBS 6284	10	Ascomycota	Saccharomycetes	Saccharomycetales	Trinity College Dublin	2739368100	5726	0.32	2591	0.452497	1.23582	Tetrapisispora blattae	Tetrapisispora	-
325	Eukaryota	Permanent Draft	Tetrapisispora phaffii CBS 4417	Tetrapisispora phaffii van der Walt Y 89, CBS 4417	16	Ascomycota	Saccharomycetes	Saccharomycetales	Trinity College Dublin	2517093022	5460	0.34	2663	0.487729	1.20203	Tetrapisispora phaffii	Tetrapisispora	-
326	Eukaryota	Finished	Genome sequencing of thermophilic and alkalophilic fungi	Thermothelomyces thermophilus ATCC 42464	7	Ascomycota	Sordariomycetes	Sordariales	DOE Joint Genome Institute (JGI)	2761201727	9110	0.51	2703	0.296707	1.15612	Thermothelomyces thermophilus	Thermothelomyces	-
327	Eukaryota	Permanent Draft	A Phylogenomic Framework to Investigate Fungal Thermophily	Thielavia antarctica CBS 123565	60	Ascomycota	Sordariomycetes	Sordariales	DOE Joint Genome Institute (JGI)	2761201796	9204	0.53	2571	0.279335	1.11513	Thielavia antarctica	Thielavia	Dung Saprotroph-Undefined Saprotroph
328	Eukaryota	Permanent Draft	A Phylogenomic Framework to Investigate Fungal Thermophily	Thielavia appendiculata CBS 731.68		Ascomycota	Sordariomycetes	Sordariales	DOE Joint Genome Institute (JGI)	2761201782	11942	0.56	2718	0.2276	1.1858	Thielavia appendiculata	Thielavia	Dung Saprotroph-Undefined Saprotroph
329	Eukaryota	Permanent Draft	A Phylogenomic Framework to Investigate Fungal Thermophily	Thielavia arenaria CBS 508.74		Ascomycota	Sordariomycetes	Sordariales	DOE Joint Genome Institute (JGI)	2761201768	10954	0.55	2697	0.246211	1.18799	Thielavia arenaria	Thielavia	Dung Saprotroph-Undefined Saprotroph
330	Eukaryota	Permanent Draft	A Phylogenomic Framework to Investigate Fungal Thermophily	Thielavia hyrcaniae CBS 757.83	219	Ascomycota	Sordariomycetes	Sordariales	DOE Joint Genome Institute (JGI)	2761201807	11338	0.58	2693	0.23752	1.1619	Thielavia hyrcaniae	Thielavia	Dung Saprotroph-Undefined Saprotroph
331	Eukaryota	Finished	Thielavia terrestris -- a Thermophilic Biomass-Degrading Fungus	Thielavia terrestris NRRL 8126	6	Ascomycota	Sordariomycetes	Sordariales	DOE Joint Genome Institute (JGI)	2761201723	9813	0.55	2708	0.27596	1.17171	Thielavia terrestris	Thielavia	Endophyte
332	Eukaryota	Permanent Draft	1000 Fungal Genomes	Thozetella sp. PMI_491	170	Ascomycota	Sordariomycetes	Chaetosphaeriales	DOE Joint Genome Institute (JGI)	2761201810	23281	0.54	2866	0.123105	1.63119	Thozetella sp.	Thozetella	Undefined Saprotroph
333	Eukaryota	Permanent Draft	Phylogenomics and the origin and diversification of Kingdom Fungi	Tilletiaria anomala UBC 951	284	Basidiomycota	Exobasidiomycetes	Georgefischeriales	DOE Joint Genome Institute (JGI)	2761201642	6810	0.56	2218	0.325698	1.08837	Tilletiaria anomala	Tilletiaria	Plant Pathogen
334	Eukaryota	Permanent Draft	Yeasts of Biotechnological, Taxonomic and Physiological Interest	Tortispora caseinolytica NRRL Y-17796	6	Ascomycota	Saccharomycetes	Saccharomycetales	DOE Joint Genome Institute (JGI)	2761201698	4657	0.45	1900	0.407988	1.09947	Tortispora caseinolytica	Tortispora	-
335	Eukaryota	Permanent Draft	Towards functional genomics: development of Schizophyllum commune as a model system to study lignocellulose degradation	Torulaspora delbrueckii CBS 1146	8	Ascomycota	Saccharomycetes	Saccharomycetales	Trinity College Dublin	2517093023	5176	0.42	2716	0.52473	1.12629	Torulaspora delbrueckii	Torulaspora	Animal Pathogen
336	Eukaryota	Permanent Draft	1000 Fungal Genomes	Tothia fuscella CBS 130266	225	Ascomycota	Dothideomycetes	Venturiales	DOE Joint Genome Institute (JGI)	2761201794	13685	0.47	2695	0.196931	1.22709	Tothia fuscella	Tothia	Litter Saprotroph
337	Eukaryota	Permanent Draft	Survey of lignocellulolytic capabilities over the order Polyporales	Trametes coccinea BRFM310	207	Basidiomycota	Agaricomycetes	Polyporales	DOE Joint Genome Institute (JGI)	2761201878	12690	0.57	2704	0.213081	1.25074	Trametes coccinea	Trametes	Wood Saprotroph
338	Eukaryota	Permanent Draft	Survey of lignocellulolytic capabilities over the order Polyporales	Trametes elegans CIRM1663	216	Basidiomycota	Agaricomycetes	Polyporales	DOE Joint Genome Institute (JGI)	2761201787	12851	0.59	2686	0.209011	1.25614	Trametes elegans	Trametes	Wood Saprotroph
339	Eukaryota	Permanent Draft	Survey of lignocellulolytic capabilities over the order Polyporales	Trametes ljubarskyi CIRM1659	291	Basidiomycota	Agaricomycetes	Polyporales	DOE Joint Genome Institute (JGI)	2761201820	13180	0.58	2701	0.204932	1.24102	Trametes ljubarskyi	Trametes	Wood Saprotroph
340	Eukaryota	Permanent Draft	SAP - Community proposal to sequence a diverse assemblage of saprotrophic Basidiomycota (Agaricomycotina)	Trametes versicolor FP-101664 SS1	236	Basidiomycota	Agaricomycetes	Polyporales	DOE Joint Genome Institute (JGI)	2761201686	14296	0.58	2623	0.183478	1.30118	Trametes versicolor	Trametes	Wood Saprotroph
341	Eukaryota	Permanent Draft	1000 Fungal Genomes	Trematosphaeria pertusa CBS 122368	47	Ascomycota	Dothideomycetes	Pleosporales	DOE Joint Genome Institute (JGI)	2761201770	17306	0.52	2799	0.161736	1.27939	Trematosphaeria pertusa	Trematosphaeria	Undefined Saprotroph
342	Eukaryota	Permanent Draft	A White paper for Fungal Comparative Genomics Tremella mesenterica	Tremella mesenterica DSM 1558	42	Basidiomycota	Tremellomycetes	Tremellales	DOE Joint Genome Institute (JGI)	2761201756	8313	0.47	2507	0.301576	1.12206	Tremella mesenterica	Tremella	Fungal Parasite
343	Eukaryota	Permanent Draft	Genomics and transcriptomics of forest soil isolates	Trichaptum abietinum L-15831 ss-1	544	Basidiomycota	Agaricomycetes	Hymenochaetales	DOE Joint Genome Institute (JGI)	2761201837	14978	0.48	2662	0.177727	1.28963	Trichaptum abietinum	Trichaptum	Wood Saprotroph
344	Eukaryota	Permanent Draft	FGP Biocontrol Fungi	Trichoderma asperellum CBS 433.97	89	Ascomycota	Sordariomycetes	Hypocreales	DOE Joint Genome Institute (JGI)	2761201899	12586	0.48	2760	0.219291	1.25362	Trichoderma asperellum	Trichoderma	Endophyte
345	Eukaryota	Permanent Draft	T atroviride, A. aculeatus, A. vadensis	Trichoderma atroviride IMI 206040	25	Ascomycota	Sordariomycetes	Hypocreales	DOE Joint Genome Institute (JGI)	2761201745	11828	0.5	2783	0.235289	1.24326	Trichoderma atroviride	Trichoderma	Endophyte
346	Eukaryota	Permanent Draft	FGP Biocontrol Fungi	Trichoderma citrinoviride TUCIM 6016	317	Ascomycota	Sordariomycetes	Hypocreales	DOE Joint Genome Institute (JGI)	2761201862	9737	0.53	2662	0.27339	1.20924	Trichoderma citrinoviride	Trichoderma	Endophyte-Epiphyt-Fungal Parasite-Plant Pathogen-Wood Saprotroph
347	Eukaryota	Permanent Draft	FGP Biocontrol Fungi	Trichoderma harzianum CBS 226.95	132	Ascomycota	Sordariomycetes	Hypocreales	DOE Joint Genome Institute (JGI)	2761201843	14095	0.49	2786	0.197659	1.30258	Trichoderma harzianum	Trichoderma	Endophyte-Fungal Parasite-Plant Pathogen
348	Eukaryota	Permanent Draft	FGP Biocontrol Fungi	Trichoderma longibrachiatum ATCC 18648	50	Ascomycota	Sordariomycetes	Hypocreales	DOE Joint Genome Institute (JGI)	2761201852	10938	0.54	2485	0.22719	1.17626	Trichoderma longibrachiatum	Trichoderma	Endophyte-Plant Pathogen
349	Eukaryota	Permanent Draft	Trichoderma reesei	Trichoderma reesei QM6a	72	Ascomycota	Sordariomycetes	Hypocreales	DOE Joint Genome Institute (JGI)	2761201751	9143	0.53	2726	0.298152	1.19516	Trichoderma reesei	Trichoderma	Endophyte-Epiphyt-Fungal Parasite-Plant Pathogen-Wood Saprotroph
350	Eukaryota	Permanent Draft	Trichoderma virens	Trichoderma virens Gv29-8	92	Ascomycota	Sordariomycetes	Hypocreales	DOE Joint Genome Institute (JGI)	2761201670	12423	0.49	2797	0.225147	1.28566	Trichoderma virens	Trichoderma	Endophyte
351	Eukaryota	Permanent Draft	Exploring the Genome Diversity of Mycorrhizal Fungi to Understand the Evolution and Functioning of Symbiosis in Woody Shrubs and Trees	Tricholoma matsutake 945	1128	Basidiomycota	Agaricomycetes	Agaricales	DOE Joint Genome Institute (JGI)	2761201890	22885	0.45	2662	0.116321	1.23629	Tricholoma matsutake	Tricholoma	Ectomycorrhizal-Fungal Parasite
352	Eukaryota	Permanent Draft	Tricholoma vaccinum	Tricholoma vaccinum	50239	Basidiomycota	Agaricomycetes	Agaricales	GATC-Biotech AG, Konstanz, Germany	2608642241	11978	0.47	2099	0.175238	1.42163	Tricholoma vaccinum	Tricholoma	Ectomycorrhizal-Fungal Parasite
353	Eukaryota	Permanent Draft	Trichophyton benhamiae CBS 112371	Trichophyton benhamiae CBS 112371	68	Ascomycota	Eurotiomycetes	Onygenales	Hans Knoell Institute (HKI), Leibniz Institute	648943102	8041	0.49	2575	0.320234	1.18718	Trichophyton benhamiae	Trichophyton	Undefined Saprotroph
354	Eukaryota	Permanent Draft	Trichophyton rubrum CMCC(F)T1i genome sequencing	Trichophyton rubrum CMCC(F)T1i	19	Ascomycota	Eurotiomycetes	Onygenales	Chinese Academy of Medical Science & Peking Union Medical College	2739368118	7051	0.48	2298	0.325911	1.11575	Trichophyton rubrum	Trichophyton	Animal Pathogen
355	Eukaryota	Permanent Draft	Trichophyton verrucosum HKI 0517	Trichophyton verrucosum HKI 0517	523	Ascomycota	Eurotiomycetes	Onygenales	Leibniz Institute	648943111	8086	0.48	2578	0.318823	1.18658	Trichophyton verrucosum	Trichophyton	Animal Pathogen
356	Eukaryota	Permanent Draft	1000 Fungal Genomes	Tritirachium sp. CBS 265.96	79	Basidiomycota	Tritirachiomycetes	Tritirachiales	DOE Joint Genome Institute (JGI)	2761201825	7254	0.4	2155	0.297077	1.1406	Tritirachium sp.	Tritirachium	Undefined Saprotroph
357	Eukaryota	Permanent Draft	Tuber melanosporum Mel28	Tuber melanosporum Mel28	398	Ascomycota	Pezizomycetes	Pezizales	CEA Genoscope	648943112	7496	0.45	2628	0.350587	1.17428	Tuber melanosporum	Tuber	Ectomycorrhizal
358	Eukaryota	Permanent Draft	Exploring the Genome Diversity of Mycorrhizal Fungi to Understand the Evolution and Functioning of Symbiosis in Woody Shrubs and Trees	Tulasnella calospora AL13/4D	1220	Basidiomycota	Agaricomycetes	Cantharellales	DOE Joint Genome Institute (JGI)	2761201636	19659	0.51	2276	0.115774	1.31986	Tulasnella calospora	Tulasnella	Endophyte
359	Eukaryota	Permanent Draft	Uncinocarpus reesii 1704	Uncinocarpus reesii 1704	16	Ascomycota	Eurotiomycetes	Onygenales	Broad Institute	648943113	7856	0.49	2536	0.322811	1.16009	Uncinocarpus reesii	Uncinocarpus	Undefined Saprotroph
360	Eukaryota	Finished	The genome sequence of Ustilago bromivora	Ustilago bromivora UB2112	24	Basidiomycota	Ustilaginomycetes	Ustilaginales	Institute of Bioinformatics and Systems Biology	2739368079	7408	0.52	2509	0.338688	1.10084	Ustilago bromivora	Ustilago	Plant Pathogen
361	Eukaryota	Permanent Draft	Ustilago maydis 521	Ustilago maydis 521	264	Basidiomycota	Ustilaginomycetes	Ustilaginales	Bayer, Broad Institute, LION Bioscience AG	640281003	6631	0.54	2241	0.337958	1.11066	Ustilago maydis	Ustilago	Plant Pathogen
362	Eukaryota	Permanent Draft	Vanderwaltozyma polyspora DSM 70294	Vanderwaltozyma polyspora DSM 70294	281	Ascomycota	Saccharomycetes	Saccharomycetales	Trinity College Dublin	645666426	5608	0.33	2594	0.462553	1.23169	Vanderwaltozyma polyspora	Vanderwaltozyma	-
363	Eukaryota	Permanent Draft	Verticillium albo-atrum VaMs.102	Verticillium albo-atrum VaMs.102	27	Ascomycota	Sordariomycetes	Glomerellales	Broad Institute	648943114	10487	0.56	2722	0.259559	1.29353	Verticillium albo-atrum	Verticillium	Plant Pathogen
364	Eukaryota	Permanent Draft	Sequencing of pathogens and extremophiles in the Dothideomycetes	Viridothelium virens Tuck. ex Michener	258	Ascomycota	Dothideomycetes	Trypetheliales	DOE Joint Genome Institute (JGI)	2761201870	11858	0.5	2691	0.226935	1.20959	Viridothelium virens	Viridothelium	-
365	Eukaryota	Permanent Draft	Phylogenomics and the origin and diversification of Kingdom Fungi	Wallemia sebi CBS 633.66	49	Basidiomycota	Wallemiomycetes	Wallemiales	DOE Joint Genome Institute (JGI)	2761201703	5284	0.4	2393	0.452877	1.11074	Wallemia sebi	Wallemia	Undefined Saprotroph
366	Eukaryota	Permanent Draft	1000 Fungal Genomes	Westerdykella ornata CBS 379.55	85	Ascomycota	Dothideomycetes	Pleosporales	DOE Joint Genome Institute (JGI)	2761201769	10410	0.53	2691	0.258501	1.16165	Westerdykella ornata	Westerdykella	Undefined Saprotroph
367	Eukaryota	Permanent Draft	Yeasts of Biotechnological, Taxonomic and Physiological Interest	Wickerhamomyces anomalus NRRL Y-366-8	37	Ascomycota	Saccharomycetes	Saccharomycetales	DOE Joint Genome Institute (JGI)	2761201697	6423	0.35	2443	0.380352	1.22227	Wickerhamomyces anomalus	Wickerhamomyces	Animal Pathogen
368	Eukaryota	Permanent Draft	1000 Fungal Genomes	Wilcoxina mikolae CBS 423.85	476	Ascomycota	Pezizomycetes	Pezizales	DOE Joint Genome Institute (JGI)	2761201830	13093	0.46	2609	0.199267	1.1468	Wilcoxina mikolae	Wilcoxina	Ectomycorrhizal
369	Eukaryota	Permanent Draft	SAP - Community proposal to sequence a diverse assemblage of saprotrophic Basidiomycota (Agaricomycotina)	Wolfiporia cocos MD-104 SS10	225	Basidiomycota	Agaricomycetes	Polyporales	DOE Joint Genome Institute (JGI)	2761201662	12746	0.52	2664	0.209007	1.24662	Wolfiporia cocos	Wolfiporia	Wood Saprotroph
370	Eukaryota	Permanent Draft	1000 Fungal Genomes	Xylona heveae TC161	23	Ascomycota	Xylonomycetes	Xylonales	DOE Joint Genome Institute (JGI)	2761201645	8205	0.48	2617	0.318952	1.14329	Xylona heveae	Xylona	Endophyte
371	Eukaryota	Permanent Draft	Yeast-based biofuel production - 2 xylose fermenting fungi	Yamadazyma tenuis ATCC 10573	23	Ascomycota	Saccharomycetes	Saccharomycetales	DOE Joint Genome Institute (JGI)	2761201754	5533	0.43	2552	0.461233	1.17672	Yamadazyma tenuis	Yamadazyma	-
372	Eukaryota	Finished	Yarrowia lipolytica CLIB122	Yarrowia lipolytica CLIB122	6	Ascomycota	Saccharomycetes	Saccharomycetales	CEA Genoscope	638208611	7042	0.49	2642	0.375178	1.18925	Yarrowia lipolytica	Yarrowia	Undefined Saprotroph
373	Eukaryota	Permanent Draft	Sequencing of pathogens and extremophiles in the Dothideomycetes	Zasmidium cellare ATCC 36951 (v2)	149	Ascomycota	Dothideomycetes	Capnodiales	DOE Joint Genome Institute (JGI)	2761201876	16015	0.53	2834	0.176959	1.39661	Zasmidium cellare	Zasmidium	Undefined Saprotroph
374	Eukaryota	Permanent Draft	1000 Fungal Genomes	Zopfia rhizophila CBS 207.26	384	Ascomycota	Dothideomycetes	unclassified	DOE Joint Genome Institute (JGI)	2761201882	21730	0.34	2774	0.127658	1.33165	Zopfia rhizophila	Zopfia	Plant Pathogen
375	Eukaryota	Finished	Zygosaccharomyces parabailii ATCC 60483 genome sequencing	Zygosaccharomyces parabailii ATCC 60483	17	Ascomycota	Saccharomycetes	Saccharomycetales	University College Dublin	2739368086	10615	0.42	2716	0.255864	2.20434	Zygosaccharomyces parabailii	Zygosaccharomyces	Plant Pathogen
376	Eukaryota	Finished	Zygosaccharomyces rouxii CBS 732	Zygosaccharomyces rouxii CBS 732	7	Ascomycota	Saccharomycetes	Saccharomycetales	CEA Genoscope	645666427	5272	0.39	2704	0.512898	1.12611	Zygosaccharomyces rouxii	Zygosaccharomyces	Undefined Saprotroph
377	Eukaryota	Permanent Draft	Mycosphaerella graminicola	Zymoseptoria tritici IPO323	21	Ascomycota	Dothideomycetes	Capnodiales	DOE Joint Genome Institute (JGI)	2761201753	10933	0.52	2715	0.248331	1.23131	Zymoseptoria tritici	Zymoseptoria	-
